# Evaluating genomic data for management of local adaptation in a changing climate: A lodgepole pine case study

Colin R. Mahony<sup>1\*</sup>, Ian R. MacLachlan<sup>1</sup>, Brandon M. Lind<sup>1</sup>,  
Jeremy B. Yoder<sup>1,2</sup>, Tongli Wang<sup>1</sup>, and Sally N. Aitken<sup>1</sup>

<sup>1</sup>Centre for Forest Conservation Genetics and Department of Forest and Conservation Sciences,  
University of British Columbia, Canada

<sup>2</sup>Department of Biology, California State University Northridge, USA

\*Corresponding Author: [c\\_mahony@alumni.ubc.ca](mailto:c_mahony@alumni.ubc.ca)

March 1, 2019

**Keywords:** genomic variation, phenotypic variation, climate change adaptation, assisted gene flow, lodgepole pine, ecological genetics

**Running head:** Evaluating genomic data for assisted gene flow

**Abstract:** The need for tools to cost-effectively identify adaptive variation within ecologically and economically important plant species is mounting as the detrimental effects of climate change become increasingly apparent. For crop and wild populations alike, mismatches between adaptive variation and climatic optima will reduce health, growth, survival, reproduction, and continued establishment. The ease with which land managers can quantify the relative importance of different climate factors or the spatial scale of local adaptation to climate will have direct implications for the potential of mitigating or resolving such risks. Using seed collected from 281 provenances of lodgepole pine (*Pinus contorta*) from across western Canada, we compare genomic data to phenotypic and climatic data to assess their effectiveness in characterizing the climatic drivers and spatial scale of local adaptation in this species. We find that genomic and climate data are nearly equivalent for describing local adaptation in seedling traits. We also find strong agreement between the climate variables associated with genomic variation and with 20-year heights from a long-term provenance trial, suggesting that genomic data may be a viable option for identifying climatic drivers of local adaptation where phenotypic data are unavailable. Genetic clines associated with cold injury occur at broad spatial scales, suggesting that standing variation of adaptive alleles for this and similar species does not require management at scales finer than are indicated by phenotypic data. This study demonstrates that genomic data are most useful when paired with phenotypic data, but can also fill some of the traditional roles of phenotypic data in management of species for which phenotypic trials are not feasible.

32 **1 Introduction**

33 The impact of climate change is undeniable and particularly evident in forests of western North  
34 America. Evidence of tree injury and mortality from droughts, floods, wildfires, disease, and insect  
35 outbreaks is mounting rapidly (van Mantgem et al. 2009; Allen et al. 2010; Anderegg et al. 2015;  
36 McDowell & Allen 2015; Reyer et al. 2015; Buotte et al. 2018). There is also mounting evidence  
37 that changes in climate are disrupting local adaptation in plants (Mcgraw et al. 2015; Wilczek et  
38 al. 2019), with impacts to productivity of commercial tree species (Rehfeldt et al. 1999; Leites et  
39 al. 2012) and conservation of vulnerable species (Parmesan 2006). In response, forest managers  
40 are seeking guidance on which source populations to use for planting, as the long-practiced ‘local  
41 is best’ strategy no longer matches trees with the climates to which they are adapted (Aitken and  
42 Bemmels 2016). There is also a need to characterize the spatial scale and genetic structure of local  
43 adaptation to understand the capacity of populations to adapt to climate change without human  
44 intervention (McKenney et al. 2007; Kawecki 2008; Aitken et al. 2008; Kremer et al. 2012). For  
45 centuries, local adaptation has been quantified and managed using phenotypic data from long-term  
46 provenance trials and short-term common gardens (Langlet 1971; Leimu and Fischer 2008;  
47 Hereford 2009). In the past two decades, detailed climate data has been used to extend phenotypic  
48 inferences of local adaptation across managed landscapes (Sork et al. 2013; Wadgyr et al. 2017)  
49 and to project mismatches between adaptive variation and future climates (e.g., Exposito-Alonso  
50 et al. 2018). Genomic data is now emerging as a third source of insight into local adaptation for  
51 non-model species. While the genomic basis of local adaptation has been extensively studied (Li  
52 et al. 2017; Sork 2018), applications of genomic data to mitigate effects of climate change are in  
53 their infancy (Shafer et al. 2015). These applications can be advanced by understanding the ways

## Evaluating genomic data for assisted gene flow

54 in which genomic data complements and overlaps with phenotypic and climatic data in  
55 characterizing local adaptation.

56 For most tree populations, the capacity to track suitable climates via migration and  
57 establishment will be outpaced by the rate of climate change (Davis and Shaw 2001; McLachlan  
58 et al. 2005; Gray & Hamann 2013), with implications to the health and productivity of both wild  
59 forests and those planted for wood or carbon sequestration. Assisted gene flow (AGF), the  
60 “intentional translocation of individuals within a species range to facilitate adaptation to anticipated  
61 local conditions” (Aitken and Whitlock 2013), is a strategy for mitigating these deleterious effects  
62 of mismatches between genotypes and climate. For instance, warmer-adapted provenances are  
63 faster growing, although less cold hardy, for many temperate and boreal species (Aitken and  
64 Bemmels 2016; Wang et al. 2010). If genotypes are moved into suitable climates, but not so far  
65 that they suffer from cold injury or other types of maladaptation, this faster growth rate is expected  
66 to translate to higher survival, better health, and greater productivity (e.g., Wadgyman et al. 2015).  
67 When the motivation for planting is conservation, AGF could bolster the demographics of rare  
68 species or accelerate stand development for habitat and other ecosystem services. Maintaining or  
69 enhancing genetic diversity is key, as the goal of assisted gene flow in conservation settings is to  
70 establish self-sustaining populations capable of natural regeneration, establishment, and further  
71 adaptation to new conditions (Aitken and Whitlock 2013; Lunt et al. 2013; Kelly and Phillips 2015;  
72 Aitken and Bemmels 2016).

73 The argument for AGF with forest trees is particularly strong, due to 1) the long history of  
74 study and understanding of local adaptation to climate in many widespread species (Langlet 1971;  
75 Morgenstern 1996); 2) the lack of strong population structure and isolation that might lead to  
76 outbreeding depression (Howe et al. 2003; Neale & Savolainen 2004; Mitton & Williams 2006;

## Evaluating genomic data for assisted gene flow

77 Savolainen et al. 2007); 3) the long generation times of forest trees and corresponding high rate of  
78 climate change per generation (McLachlan et al. 2005; Petit and Hampe 2006; Aitken et al. 2008;  
79 Alberto et al. 2013); and 4) the infrastructure and operational practices that already exist for  
80 collecting or producing seeds, growing seedlings, and reforesting harvested or otherwise disturbed  
81 areas (Aitken and Bemmels 2016). Effective AGF strategies require an understanding of the nature  
82 of local adaptation to climate, particularly the major climatic drivers of local adaptation and how  
83 strongly populations are differentiated along these climatic gradients.

84 Forest scientists have traditionally used provenance trials—*in situ* field-based common garden  
85 experiments that usually involve partial reciprocal transplants—to understand links between  
86 phenotypes under divergent selection and the environments driving those differences (see  
87 discussion in Lind et al. 2018). Such designs have been the major source of knowledge of local  
88 adaptation trees for over two centuries, where differentiation among populations is usually  
89 attributed to the source environment of individuals (Langlet 1971; Morgenstern 1996). In  
90 provenance trials, phenotypic data is often limited to survival and growth rather than component  
91 traits directly related to climate, such as tolerance of cold, drought, insects, or diseases. Multi-site  
92 provenance trials can therefore provide excellent information on local adaptation, but they are  
93 limited by the decades-long time frame needed to obtain meaningful data and by the restricted  
94 geographic and climatic scopes of such trials for many species (Kawecki and Ebert 2004; Aitken  
95 et al. 2008; de Vilmereuil et al 2015). Moreover, provenance trials are not feasible for some  
96 species due to a lack of available sites, sufficient resources, ethical reasons, or the difficulty of  
97 obtaining seed from many populations, particularly for endangered species or species with seed  
98 that cannot be stored (Morgenstern 1996; Blanquart et al. 2013; de Vilmereuil et al. 2015;  
99 Flanagan et al. 2018).

## Evaluating genomic data for assisted gene flow

100       Single or multi-environment seedling common gardens provide some advantages over  
101 traditional provenance trials. While single common gardens can be used to test for differentiation  
102 among genetic groups and to develop transfer functions (Matyas 1994; O’Neill et al. 2008),  
103 multiple common gardens can be used to test for environmental forces driving this differentiation,  
104 and need not necessarily be within source environments of populations under study. Such  
105 experiments allow for detailed phenotyping of climate-related traits at the vulnerable seedling stage  
106 that have important fitness consequences for the populations under consideration (e.g., phenology,  
107 cold- or drought-hardiness, growth, and allocation of biomass; see refs in Cornelius 1994, Howe et  
108 al. 2003, Savolainen et al. 2007; Alberto et al. 2013, and Lind et al. 2018). However, juvenile  
109 phenotypes may not reflect fitness-related traits at later life stages (e.g., reproduction) and such  
110 experimental environments are often artificial (Kawecki and Ebert 2004).

111       Due to the prevalence of the transplant designs mentioned above, phenotypic inferences of  
112 local adaptation and their applications to seed transfer of forest trees have been traditionally  
113 characterized in geographic terms. For example, seed transfer limits for wild-sourced seedlings in  
114 British Columbia were until recently defined as a maximum latitude, longitude, and elevation that  
115 seedling stock could be transferred from their provenance to the planting site (Ying and Yanchuk  
116 2006). The advent of high-resolution gridded climate data over the past two decades (e.g., PRISM,  
117 Daly et al. 2002) has allowed more precise inferences of the spatial distribution of local adaptation  
118 (Wang et al. 2010) and has facilitated the transition from geography-based to climate-based seed  
119 transfer (O’Neill et al. 2017). When integrated with climate change projections (e.g., ClimateNA,  
120 Wang et al. 2016; and WorldClim, Fick and Hijmans 2017), climate data provide the essential basis  
121 for AGF and address some of the shortcomings of geographically-based (“local is best”) seed  
122 zones. While generic approaches to climate variable selection may provide a first approximation

## Evaluating genomic data for assisted gene flow

123 for AGF (e.g., niche modeling), information tailored to species-specific patterns relating adaptive  
124 phenotypic variation to climate will better tailor AGF strategies (e.g., as in O'Neill et al. 2017), as  
125 climatic factors limiting a species' niche may not be those driving differentiation among  
126 populations.

127 In situations where phenotypic data is unavailable, genomic data could potentially be a useful  
128 alternative to phenotypic data for inferring the climatic drivers of local adaptation. Population  
129 genomic approaches for detecting adaptive variation have become feasible within the last decade  
130 (Neale & Savolainen 2004; Sork et al. 2013; Prunier et al. 2015; Lind et al. 2018). Next generation  
131 sequencing methods now allow for the genotyping of large numbers of variants (e.g., single  
132 nucleotide polymorphisms, SNPs) in non-model species for elucidating aspects of the species  
133 biology that can inform management and conservation decisions (Lotterhos et al. 2018; Mähler et  
134 al. 2017; Flanagan et al. 2018; Parchman et al. 2018; Rellstab et al. 2018). Genotype-environment  
135 association (GEA) approaches can identify both the environmental drivers of local adaptation and  
136 loci underlying locally adaptive traits (Schoville 2012; De Mita et al. 2013; Rellstab et al. 2015).  
137 Likewise, genotype-phenotype association (GPA) studies can identify loci associated with climate-  
138 related phenotypes (Neale & Savolainen 2004; Prunier et al. 2015; Holliday et al. 2017). These  
139 methods can be combined to identify suites of potentially locally adapted loci (e.g., Yeaman et al.  
140 2016; references in Lind et al. 2018). Despite the extensive literature on the genomic basis of local  
141 adaptation, however, we are not aware of any operational uses of genomic data to guide seed  
142 transfer or AGF.

143 Genomic data have many potential roles in guiding AGF as an alternative or a supplement to  
144 phenotypic and climatic data. Given the unavoidable costs and lag time of provenance trials and  
145 common garden experiments, the prospect of characterizing local adaptation using genomics rather

## Evaluating genomic data for assisted gene flow

146 than phenotypes is appealing. Genomic approaches could bring down the cost and response time  
147 of managing AGF for commercially important tree species, and also provide the opportunity for  
148 comprehensive (or strategic) genetic conservation of many species that lack resources for  
149 phenotypic trials. In addition to being a potential alternative to phenotypes, genomic data can  
150 provide unique insights into local adaptation that are not available from phenotypic or climatic data  
151 alone. For example, rangewide phenotypic clines can potentially mask more localized allelic clines  
152 that underlie adaptive traits (see Box 1). Similarly, the spatial structure of standing variation in  
153 adaptive alleles—an important consideration for AGF and *in situ* genetic conservation—can only  
154 be inferred from genomic data.

155 The objective of this study is to evaluate genomic data, relative to phenotypic and climatic  
156 data, as a basis for assisted gene flow and genetic conservation of locally-adapted conifers. We  
157 address three research questions using phenotypic and genomic data from 281 provenances of  
158 *Pinus contorta* Dougl. ex Loud from across western Canada. Firstly, *what is the relative value of*  
159 *genomic data vs. climatic and geographic data in explaining locally adaptive phenotypic*  
160 *variation?* We address this by comparing the proportion of variance in four seedling traits that can  
161 be explained by geographic, climatic, and several types of genomic data including a full SNP array,  
162 a large set of neutral markers, and loci inferred from both genotype-phenotype associations and  
163 genotype-environment associations. Secondly, *can genomic data identify the climatic drivers of*  
164 *local adaptation?* We use phenotypic data from both a short-term common garden study and a  
165 long-term provenance trial to contrast the predicted importance of various climatic drivers of  
166 phenotypic differentiation to that predicted from genomic data (GEA loci). Thirdly, we examine  
167 information that is uniquely available from genomic data—the genetic clines underlying  
168 phenotypic clines—to address the question: *what is the spatial scale of local adaptation to climate?*

## Evaluating genomic data for assisted gene flow

169 These assessments identify the contributions that genomic data can make to assisted gene flow and  
170 genetic conservation in a changing climate.

### 171 **BOX 1—The structure of allelic variation underlying phenotypic clines in adaptive traits**

172 For widespread tree species that  
173 experience both strong diversifying  
174 selection and high gene flow, climatic  
175 gradients often drive clinal variation in  
176 phenotypes (Endler 1977; Alberto et al.  
177 2013). However, the number and geographic  
178 distribution of adaptive loci underlying  
179 these patterns is, for the most part, unknown.

180 There are two ways for genetic clines to  
181 produce a rangewide cline in an additive  
182 polygenic trait (Figure 1). The first is to have  
183 concordant clines in the underlying loci,  
184 representing a gradual rangewide shift in  
185 allelic frequency across all underlying loci  
186 (Figure 1B) that therefore matches the range  
187 -wide phenotypic cline (Figure 1A). Altern-  
188 atively, a phenotypic cline can result from  
189 multiple distinct, localized genetic clines,  
190 each providing variation sequentially over  
191 short sections of the environmental gradient  
192 (Barton 1999; see also Box 3 in Savolainen  
193 et al. 2007), as depicted in Figure 1C.

194 The degree to which local adaptation is  
195 structured as localized, sequential genetic  
196 clines has implications for AGF, as this may  
197 reduce the amount of standing adaptive  
198 variation and thus adaptive potential.  
199 Ultimately, the spatial scale of adaptation is  
200 a function of gene flow, selection, and drift.  
201 In species with long-isolated populations  
202 and little gene flow, such structure could  
203 also risk lower compatibility between native

204 and transplanted individuals, but outbreeding depression is unlikely in widespread, abundant,  
205 wind-pollinated trees (Aitken and Whitlock 2013). If adaptive variation is distributed as concordant  
206 range-wide genetic clines, loci underlying an adaptive trait will be polymorphic throughout most  
207 of the species range, except perhaps at the range margins, or in otherwise isolated or small  
208 populations. In this case, standing variation should exist for adaptive loci that could enable *in situ*  
209 adaptation to climatic change, as long as locally novel climatic conditions exist elsewhere in the  
210 species range and are not isolated from gene flow. Localized clines, in contrast, imply that standing  
211 variation in a subset of adaptive alleles is limited to only a portion of the species' range.

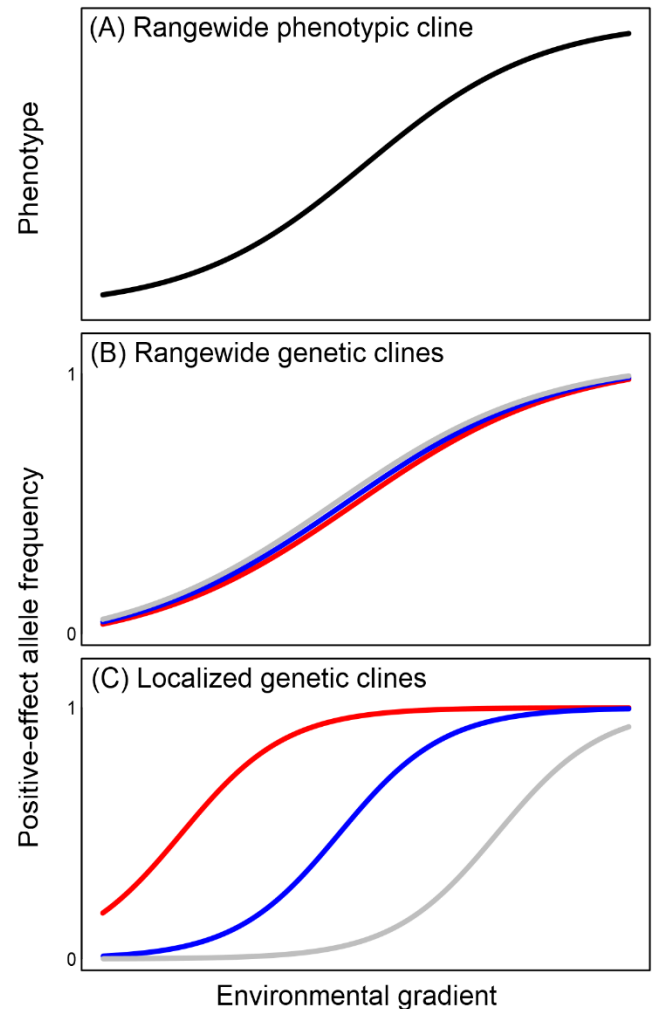

**Figure 1:** Illustration of rangewide vs. sequential, localized genetic clines (B-C) underlying a continuous phenotypic cline (A) along an environmental gradient (After Barton 1999).



## 212 2 Methods

### 213 2.1 Phenotypic data

#### 214 2.1.1 Seedling common garden experiment

215 The primary phenotypic data in this study originate from a raised bed common garden of 1,594  
216 lodgepole pine seedlings at Totem Field at the University of British Columbia in Vancouver, BC.  
217 Design, establishment, and measurement of the common garden, summarized here, are described  
218 in detail by MacLachlan et al. (2017). Briefly, seedlots originated from 281 provenances  
219 representing lodgepole pine's climatic range within British Columbia and Alberta (Figure 2E).  
220 Seedlots were predominantly selected from the range of the Rocky Mountain subspecies (*P.*  
221 *contorta* Dougl. ex Loud. ssp. *latifolia* [Engelm.] Critchfield), but also include the coastal  
222 subspecies (*P. contorta* Dougl. ex Loud. ssp. *contorta*) and the region of hybridization with jack  
223 pine (*Pinus banksiana* Lamb.) in northern Alberta.

224 Our study utilizes phenotypic data from four traits: growth initiation, growth cessation, autumn  
225 cold injury, and shoot mass (methods in MacLachlan et al. 2017). We removed experimental effects  
226 from phenotypic values by reporting phenotypes as  $z$ -standardized residuals of a linear mixed  
227 effects model, implemented with ASreml-R (Butler 2009), in which experimental block and  
228 location within block are random effects:

$$229 \quad Y_{ijk} = \mu + B_j + L(B)_{jk} + e_{ijk} \quad (1)$$

230 where  $Y_{ijk}$  is the phenotypic observation of a trait made on individual  $i$  grown in the  $j^{\text{th}}$  block ( $B$ ),  
231 at the  $k^{\text{th}}$  seedling location ( $L$ ) nested within block ( $L(B)_{jk}$ ),  $\mu$  is the experimental mean, and  $e$  is  
232 the residual error of individual  $i$ .

## Evaluating genomic data for assisted gene flow

### 233 2.1.2 *Illingworth provenance trial*

234 We analyzed 20-year heights from the Illingworth lodgepole pine provenance trial to  
235 corroborate the inferences from the Vancouver seedling common garden with longer-term data  
236 from sites more typical for this species. This trial, established in 1974 by the BC Ministry of Forests  
237 (Illingworth 1978; Wang et al. 2010), tested a rangewide (New Mexico to Yukon) collection of  
238 140 provenances at 60 sites in interior British Columbia. We assessed the strength of the univariate  
239 relationships between 20-year height and 19 climate variables for three contrasting trial sites: one  
240 each from southern (PETI), central (NILK) and northern (WATS) British Columbia (Supp. Info  
241 Figure S1). An adjusted  $R^2$  was estimated for the quadratic relationship between provenance  
242 climate and the average 20-year heights of the provenances at each test site. This relationship was  
243 estimated for each of the 19 standard climate variables (Table 1) used in this study. Reported  
244 results are the mean  $R^2$  over the three sites.

### 245 2.2 *Climate data*

246 Climate normals 1961-1990 period for each provenance in the seedling common garden were  
247 obtained from ClimateNA (Wang et al. 2016), using the latitude, longitude, and elevation of each  
248 seedlot. The 19 bioclimatic variables used in this study (Table 1) are the same as used in previous  
249 analyses of genomic datasets from the AdapTree Project, selected *a priori* based on relevance to  
250 the species biology and environmental variation across provenances (Yeaman et al. 2016a;  
251 MacLachlan et al. 2017; Lotterhos et al. 2018). In addition to these 19 analysis variables, we use  
252 autumn mean daily minimum temperature (Tmin\_at) as the environmental gradient for plotting  
253 phenotypic and genetic clines. We selected Tmin\_at due to its biological relevance to autumn cold  
254 injury, growth cessation, and shoot mass.

## Evaluating genomic data for assisted gene flow

| Environmental Variable (unit)                          | Abbreviation | <b>TABLE 1</b> The set of 19 bioclimatic variables used in this study |
|--------------------------------------------------------|--------------|-----------------------------------------------------------------------|
| Mean annual temperature (°C)                           | MAT          |                                                                       |
| Mean warmest month temperature (°C)                    | MWMT         |                                                                       |
| Mean coldest month temperature (°C)                    | MCMT         |                                                                       |
| Continentality (MWMT minus MCMT) (°C)                  | TD           |                                                                       |
| Mean annual precipitation (mm)                         | MAP          |                                                                       |
| May to September precipitation (mm)                    | MSP          |                                                                       |
| Annual heat-moisture index (MAT+10)/(MAP/1000) (°C/μm) | AHM          |                                                                       |
| Summer heat-moisture index ((MWMT)/(MSP/1000)) (°C/μm) | SHM          |                                                                       |
| Degree-days below 0°C, chilling degree-days            | DD_0         |                                                                       |
| Degree-days above 5°C, growing degree-days             | DD_5         |                                                                       |
| Number of frost-free days (days)                       | NFFD         |                                                                       |
| Frost-free period (days)                               | FFP          |                                                                       |
| The day of the year on which FFP begins (Julian date)  | bFFP         |                                                                       |
| The day of the year on which FFP ends (Julian date)    | eFFP         |                                                                       |
| Precipitation as snow between August and July (mm)     | PAS          |                                                                       |
| Extreme minimum temperature over 30 years (°C)         | EMT          |                                                                       |
| Extreme maximum temperature over 30 years (°C)         | EXT          |                                                                       |
| Hargreaves reference evaporation (mm)                  | Eref         |                                                                       |
| Hargreaves climatic moisture deficit (mm)              | CMD          |                                                                       |

### 255 2.3 Genomic data

#### 256 2.3.1 SNP table

257 DNA was extracted from tissue of spring needles using a Macherey-Nagel Nucleospin 96 Plant  
 258 II Core™ kit, automated on an Eppendorf EpMotion 5075™ liquid handling platform. Samples  
 259 were genotyped by Neogen GeneSeek (Lincoln, Nebraska) using the AdapTree lodgepole pine  
 260 Affymetrix Axiom 50K lodgepole pine SNP array. SNP discovery for this array was based on the  
 261 lodgepole pine sequence capture dataset described by Yeaman et al. (2016) and Suren et al. (2016).  
 262 It included probes for the exons of 24,388 genes, as well as intergenic regions, with intron-exon  
 263 boundaries identified by mapping the lodgepole pine transcriptome to the loblolly pine (*Pinus*  
 264 *taeda* L.) v1.01 draft genome (Neale et al. 2014, Zimin et al. 2014). SNPs were selected for  
 265 inclusion based on preliminary GEA analyses as well as GPA using phenotypes for seedling traits  
 266 (Yeaman et al. 2016), differentially-expressed genes (Yeaman et al. 2014), candidate genes for

## Evaluating genomic data for assisted gene flow

267 climate adaptation from other conifers, mappable SNPs for a linkage map, and a set of non-coding  
268 loci to control for neutral population structure. Genotypes from the SNP table were filtered to  
269 retain 36,384 SNPs with a minor allele frequency  $\geq 0.01$ . Of these filtered loci, 4,750 selectively  
270 neutral SNPs (those intergenic SNPs that had no significant genotype-phenotype or genotype-  
271 environment associations in the analyses of Yeaman et al. 2016) were selected for population  
272 structure correction in association analyses. Excluding this “neutral set”, the final candidate  
273 adaptive SNP table used in associations contained 31,634 SNPs. We genotyped 1,594 seedlings  
274 from the Vancouver outdoor common garden and an additional 1,906 seedlings from the same 281  
275 provenances grown in a separate growth chamber experiment (Liepe et al. 2016), for a total median  
276 sample size of 11 seedlings (range seven to 24) for each provenance (Figure S2).

### 277 2.3.2 Genotype-Phenotype Association (GPA)

278 We implemented GPA using the phenotypic residual values (from Eq. 1) for each of the four  
279 traits measured at the Vancouver common garden using the linear regression-based *mlma* function  
280 in GCTA (Yang et al. 2011). We corrected for population structure using the *grm* option of *mlma*  
281 with the 4,750 putatively neutral SNPs described in §2.3.1. We limited marker data to one SNP per  
282 contig to reduce redundancies due to physical linkage, which reduced the number of available SNPs  
283 from 31,634 to ~19,600 SNPs. SNPs in the bottom 1% of GPA *p*-values for each trait were  
284 identified as candidate SNPs ( $n = 196$  SNPs per trait). For each candidate SNP, the allele that  
285 increased the value of a phenotype – called the positive effect allele (PEA) – was identified from  
286 the regression slope in the GCTA *mlma* output.

### 287 2.3.3 Genotype-Environment Associations (GEA)

288 We used *bayenv2* (Coop et al. 2010; Günther & Coop 2013) to identify loci with evidence  
289 for responses to environmental selection. The neutral covariance matrix for this analysis was

## Evaluating genomic data for assisted gene flow

290 estimated using the set of 4750 neutral loci for 100,000 iterations. For each centered and  
291 standardized environmental variable (Table 1), we ran `bayenv2` in test mode for one million  
292 iterations across three independent chains for the 31,634 loci that did not overlap with the neutral  
293 set, using the covariance matrix to correct for neutral population structure. To reduce the marker  
294 set to one SNP per contig (~19,600 SNPs), we retained loci that had the greatest evidence for  
295 environmental response from each contig (average rank across absolute *rho* and Bayes factor [BF]  
296 across the three chains; i.e., six values). To ensure we isolated only loci with the strongest evidence  
297 for environmental influence, we re-ranked these ~19,000 loci and retained only those that met two  
298 criteria for a given environmental association: 1) the locus was in the top 300 ranked loci for BF  
299 for each of the three chains, and 2) was also in the top 300 ranked loci for absolute value of *rho* for  
300 each of the three chains. In addition to using these GEA loci towards our objectives, we report the  
301 number of loci identified using these criteria, as well as the overlap between GPA and GEA.

### 302 **2.4 Analyses**

303 We present three analyses that correspond to the three research questions posed in the final  
304 paragraph of the Introduction.

#### 305 *2.4.1 Phenotypic variation explained by geographical, climatic, and genomic data.*

306 One way of assessing the relative value of geographic, climatic and genomic data for guiding  
307 assisted gene flow and other climate adaptation strategies is to measure the degree to which they  
308 can be used to statistically explain locally adaptive phenotypic variation. The dimensionality of the  
309 information in each data source is expected to differ: for example, genome-wide data may be  
310 distributed over many more modes of variation than the three dimensions (latitude, longitude,  
311 elevation) required to fully describe geographic location. These data sources can be compared on  
312 equal terms by extracting their principal components (PCs) and assessing the cumulative

## Evaluating genomic data for assisted gene flow

313 explanatory content of increasing numbers of PCs as predictor variables. Explanatory content in  
314 this case is measured as proportion of variance explained ( $R^2$ ) by a multivariate regression of  
315 phenotypic values (the response variable) against the PCs of the geographical, climatic, or genomic  
316 data (the predictor variables). We used multiple linear regression for this purpose, and report the  
317 mean  $R^2$  of a 5-fold cross-validation implemented with the *cv.lm* function of the DAAG package  
318 in R (R Core Team 2017). For comparison, we also performed this analysis with Random Forest  
319 regression, a regression tree ensemble learning algorithm that provides cross-validated modeling  
320 of non-linear relationships and variable interactions (Breiman 2001). For this analysis, we selected  
321 a subset of *climate-associated* GPA loci with  $R^2 > 0.2$  in multiple linear regressions on the 19 climate  
322 variables specified in Table 1.

### 323 2.4.2 Climatic drivers of local adaptation

324 We examine the congruence of genomic vs. phenotypic data in guiding climatic variable  
325 selection by contrasting the proportion of variance of individual climate variables that is explained  
326 by climate-associated genomic loci, seedling common garden phenotypes, and long-term  
327 provenance trial phenotypes. For each data source, we conducted one regression for each of the  
328 19 climate variables (Table 1), in which the response (dependent) variable is the provenance  
329 climates for a single climate variable. The predictor (independent) variables for the genomic  
330 regressions are the first four principal components of the minor allele frequencies for the top-300  
331 GEA loci associated with the climate variable of interest (see §2.3.3 for GEA methods). The  
332 predictor variables for the seedling common garden regressions are the provenance means of the  
333 standardized phenotypes for the four traits (see §2.1.1). The predictor variables for the long-term  
334 provenance trial are the 20-year heights measured at three sites of the Illingworth trial (see §2.1.2).  
335 Note that the Illingworth data sample a different set of provenances than the genomic and seedling

## Evaluating genomic data for assisted gene flow

336 common garden data, and thus are essentially independent of these two other data sources. As in  
337 the previous analysis (§2.4.1), we used multiple linear regression and report the mean  $R^2$  of a five-  
338 fold cross-validation for each regression.

### 339 2.4.3 *Spatial scale of local adaptation to climate*

340 To characterize the genetic clines associated with the seedling traits measured in the common  
341 garden, GPA loci were clustered using a Euclidean k-means algorithm (*kmeans{stats}*; R Core  
342 Team 2017). To cluster SNPs, we transposed the provenance-mean positive-effect allele frequency  
343 data so that SNPs occupied the row (observations) position and provenances occupied the column  
344 (variable) position. Clusters, then, are SNPs that have similar allele frequencies across  
345 provenances. Similarity in this configuration is distinct from correlation: SNPs with large  
346 differences in aggregate allele frequency will be put in separate clusters, even if they are very  
347 highly correlated. Hence this clustering approach is distinct from standard LD clustering  
348 approaches based on allele frequency covariance. We use the cluster mean positive-effect allele  
349 frequency for each provenance to visually summarize the clusters. Averaging reduces variance,  
350 however, which distorts genetic clines. To restore the variance of the cluster mean positive effect  
351 allele (PEA) frequency, we multiplied the cluster-mean PEA frequency for each provenance by the  
352 mean standard deviation of the SNPs in the cluster.

353 To investigate levels of standing variation, we calculated expected heterozygosity ( $H_e$ ) for  
354 each PEA in each provenance. The cluster-mean  $H_e$  for each provenance is the mean  $H_e$  for each  
355 SNP within the cluster. We report standing variation as proportional polymorphism for each  
356 provenance: the proportion of SNPs within a cluster with  $H_e > 0$ .

357 **3 Results**

358 **3.1 Phenotypic clines**

359 Provenance-mean phenotypes for all four traits measured in the Vancouver common garden  
360 exhibit moderate to strong clines relative to study area temperature gradients where the timing of  
361 growth cessation and fall cold injury show the strongest relationships with many climate variables,  
362 such as autumn mean daily minimum temperature (Figure 2). In general, trees from colder  
363 provenances initiated growth slightly earlier, ceased growth earlier, achieved less total growth, and  
364 exhibited less cold injury. Autumn cold injury in particular has a very strong relationship ( $r = 0.83$ )  
365 to autumn temperature. Within-provenance variation among individuals is generally uncorrelated  
366 among the four traits (Figure S3). However, within-provenance variation of shoot mass is  
367 positively correlated to growth cessation day ( $r=0.59$ ) and weakly but significantly negatively  
368 correlated to growth initiation day ( $r = -0.18$ ,  $p = 2E-12$ ). This result may be due to the benign

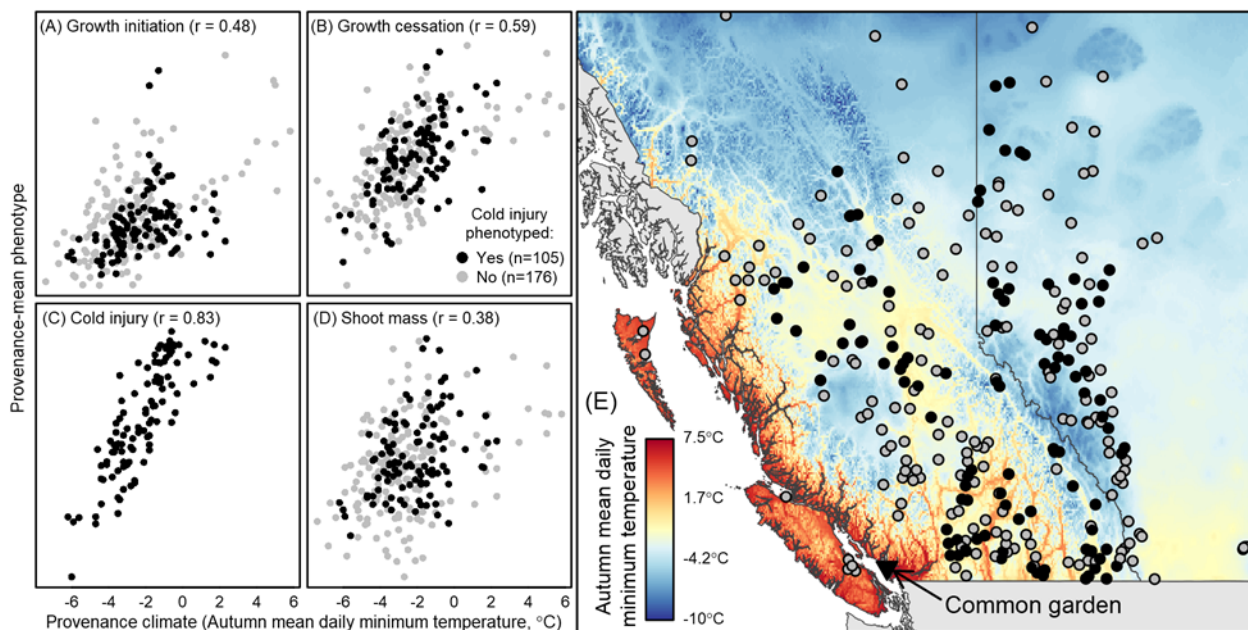

**FIGURE 2** Phenotypic clines of four traits in lodgepole pine seedlings grown in a common garden. A total of 1,594 seedlings from 281 provenances across British Columbia and Alberta, Canada (grey and black circles) were phenotyped for growth initiation (A), growth cessation (B), and three-year shoot mass (D). A subset of 922 seedlings from 105 provenances (black circles) were tested for autumn cold injury (C). Phenotypic clines (A-D) are plotted on an environmental gradient of autumn mean daily minimum temperature, mapped in (E).



## Evaluating genomic data for assisted gene flow

369 maritime climate of the common garden; seedlings with a longer growth period are not penalized  
370 by environmental constraints such as growing season frosts. Correlations of among-provenance  
371 variation in growth cessation, fall cold injury, and shoot mass are moderate to strong. Growth  
372 initiation is poorly correlated with the other traits.

### 373 **3.2 Phenotypic variation explained by geographical, climatic, and genomic data**

374 The absolute and relative explanatory content of geographical, climatic, and genomic data  
375 differs among traits (Figure 3). Differences in the explained phenotypic variation among traits  
376 generally exceed the differences among the three types of data (geographic, climatic and genomic)  
377 within traits, and mirror the strength of the phenotypic clines in Figure 2. Nevertheless, there are  
378 important differences in the relative explanatory content of geographic, climatic, and genomic data  
379 among traits. In general, geographic variables (yellow diamonds) are as predictive of seedling  
380 phenotypes as climatic variables (gray circles, Figure 3), consistent with strong local adaptation to  
381 geographically-based climate in this species. The exception is growth initiation, where geographic  
382 variables are more explanatory than climate. The GPA SNPs (solid black line, Figure 3) are more  
383 explanatory than climate and geography in growth initiation and shoot mass but not growth  
384 cessation, where they are equivalent, and cold injury, where they are slightly inferior.

385 The relative explanatory power of different types of genomic data is consistent among traits  
386 (Figure 3), and provides several insights. First, GPA SNPs (solid black line) consistently have the  
387 highest explanatory power. Since the GPA SNPs are a subset of the full array (solid gray line), the  
388 difference between GPA and full SNP array indicates the value of extracting the relevant genetic  
389 information. Second, the climate-associated GPA SNPs (black-dashed line, Figure 3) generally  
390 explain less phenotypic variation than the full set of GPA SNPs. In the case of growth initiation,  
391 however, climate-associated GPA SNPs explain more phenotypic variation than climate variables.

## Evaluating genomic data for assisted gene flow

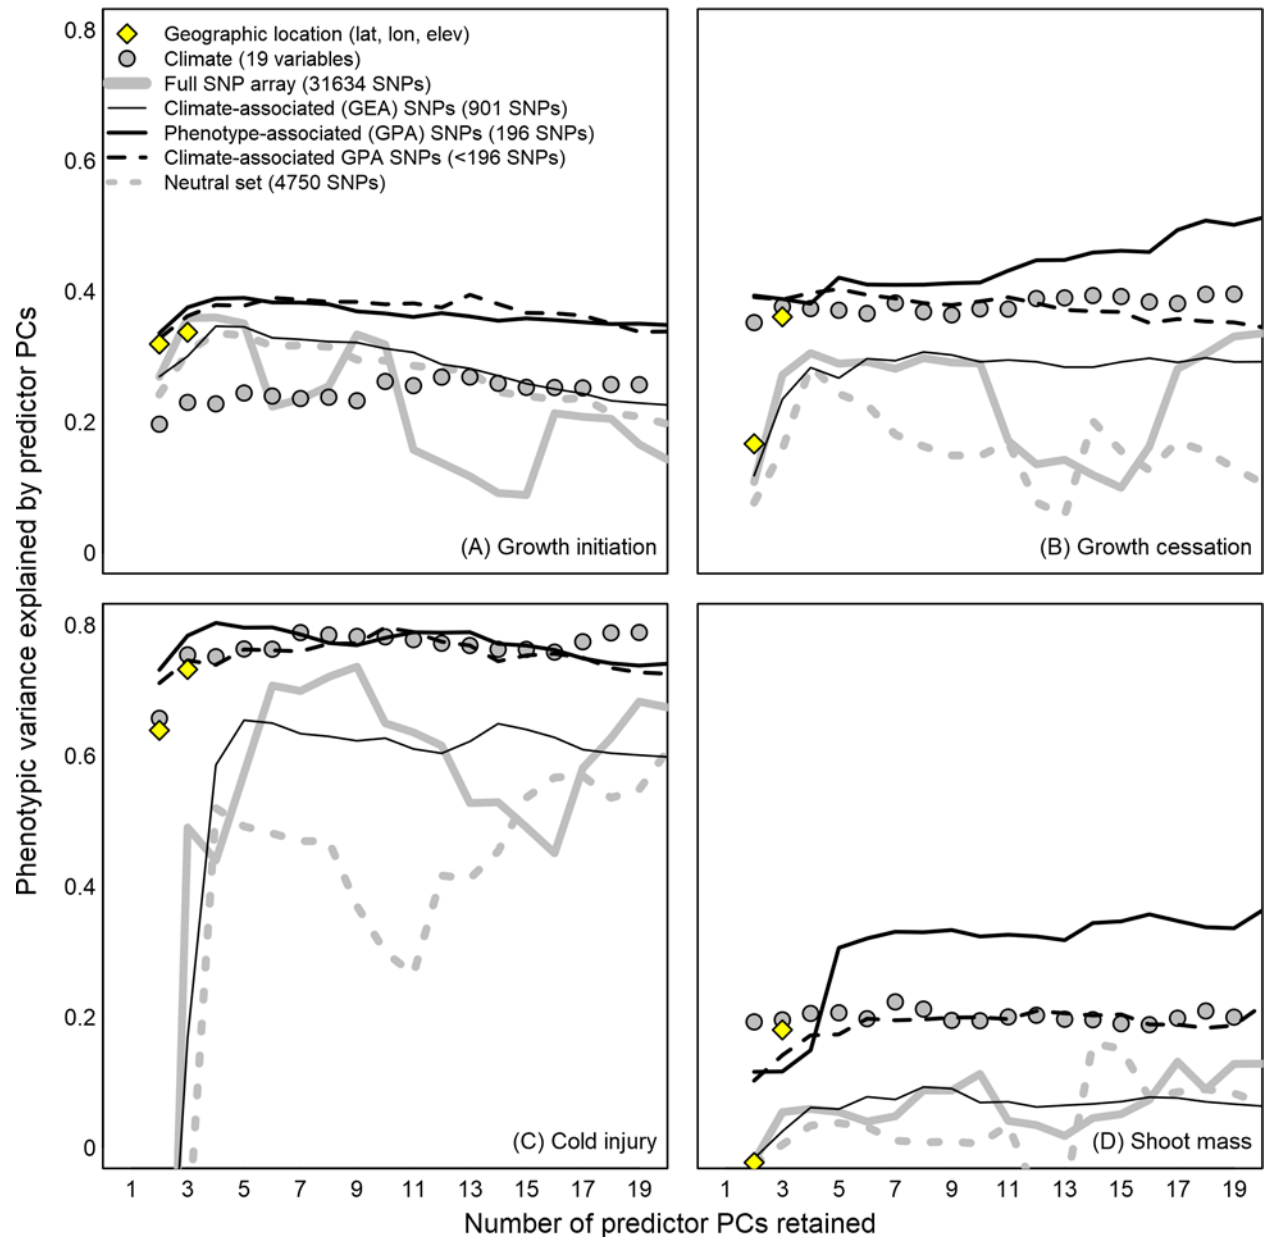

**FIGURE 3** Common garden phenotypic variance explained (PVE) for four traits by cumulative principal components of geography (diamonds), climate (circles), and several subsets of genomic data from a SNP array (lines). Each point is the cross-validated  $R^2$  of a multiple linear regression of provenance-mean phenotype against the specified number of principal components of the predictor data. GEA SNPs (thin black line) are the pooled top-300 SNPs based on Bayes factor from each of the 19 climate variables. GPA SNPs (thick black line) are the top 1% of coding-region SNPs (maximum of one SNP per contig) based on the p-value of a population-structure-corrected linear association of allele frequencies to seedling phenotypes. Climate-associated GPA SNPs (black dashed line) are GPA SNPs with a linear association to climate (see §2.4.1). The neutral set is shown as a grey dashed line.

392 Third, the GEAs identified using `bayenv2` (Supplemental Table S1) consistently have low  
 393 explanatory power to predict phenotypic variation, but higher and more stable explanatory power  
 394 than the neutral set and the full SNP array. There is a fairly high overlap of GEA with GPA loci,

## Evaluating genomic data for assisted gene flow

395 with an average of 53% of GEA SNPs from various environmental variables found within 1000 bp  
396 of GPA loci (range 0% for NFFD to 81% for EXT; sd = 20.6%), and a total of 35% of GPA SNPs  
397 found within 1000bp of the GEA loci found across environmental variables (Supplemental Table  
398 S1). This is another line of evidence of the strong role of climate in driving phenotypic variation  
399 among provenances.

400 The neutral set and full SNP array both have explanatory relationships with phenotypes, but  
401 these are not as strong as relationships with geographic, climatic, and filtered genomic data (Figure  
402 3). An equivalent analysis to Figure 3 using Random Forest regression instead of linear regression  
403 demonstrates that both the neutral set and full SNP array contain almost as much non-linear  
404 explanatory information as the climatic and geographic variables (Figure S4). Further, some  
405 subsets of the neutral set exhibit linear relationships to phenotype that are as strong and stable as  
406 the relationships of GEA loci to phenotype (Figure S5).

407 Traits differ substantially in the dimensionality of their associated genomic information, i.e.,  
408 the number of PCs at which further gains in explanatory information are not achieved. Explainable  
409 variation in growth initiation, growth cessation, and autumn cold injury are almost completely  
410 described by the first two PCs (Figure 3). In contrast, five PCs are required to describe the  
411 explainable variation in shoot mass. The dimensionality of explanatory information in the different  
412 traits speaks to the complexity of genetic controls on the trait.

### 413 **3.3 Climatic drivers of local adaptation**

414 The GEA loci show general congruence with both the short-term (3-yr) common garden  
415 experiment (Figure 4A) and a longer-term (20-yr) provenance trial (Figure 4B). Across both  
416 phenotypic traits and the genomic GEA data, there is agreement that local adaptation is strongly  
417 associated with winter temperature variables: mean temperature of the coldest month (MCMT),

## Evaluating genomic data for assisted gene flow

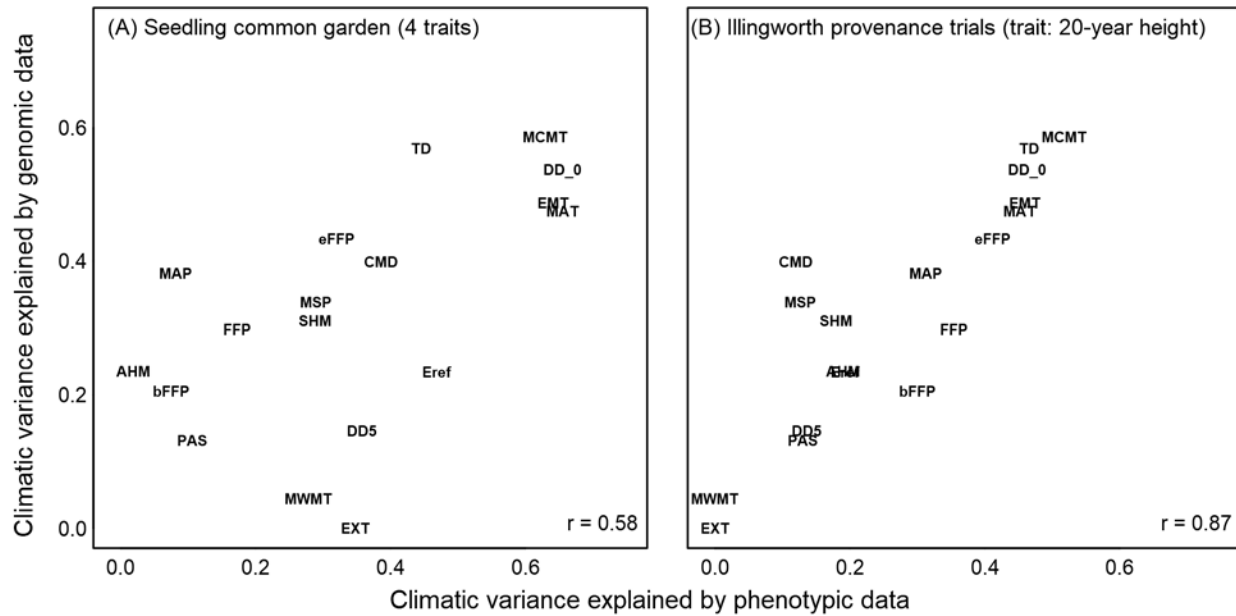

**FIGURE 4** Climatic variable selection based on phenotypic vs genomic data. Variance explained is the cross-validated  $R^2$  of a multiple linear regression of each climate variable (response variable) against the phenotypic or genomic predictor variable set. Genomic data (predictor variables for the y-axis analyses) are four principal components of the minor allele frequencies for the top-300 GEA SNPs identified by *bayenv2* for each climate variable. Phenotypic data (predictor variables for the x-axis analyses) for panel A are provenance-mean phenotypes for the four common-garden traits presented in Figure 2. Phenotypic predictor data for panel B are 20-year heights of the Illingworth lodgepole pine provenance trial. Climate variable acronyms are described in Table 1.

418 degree-days below 0°C (DD\_0), winter-summer temperature contrast (TD), and extreme minimum  
 419 temperature (EMT; variables in upper right of Figure 4A and 4B). Note that mean annual  
 420 temperature can be considered primarily a winter variable in this study area because spatial  
 421 variation in mean temperature along the latitudinal gradient is much stronger in winter than in other  
 422 seasons. In the Vancouver common garden (Figure 4A), this congruence between genotypic and  
 423 phenotypic relationships to climate variables is broken by summer temperature variables (Eref,  
 424 EXT, DD5, and MWMT), which have moderate associations with phenotypes (x-axis) but low  
 425 associations with genotypes (y-axis). In the provenance trial (Figure 4B), the congruence is broken  
 426 by summer precipitation variables (MSP and CMD), which have low associations with phenotype  
 427 but moderate associations with genotype. The same pattern of these relationships is produced using  
 428 either the full SNP array or the neutral SNPs in place of the GEA SNPs (Figures S6 and S7,

## Evaluating genomic data for assisted gene flow

429 respectively).

### 430 3.4 Spatial scale of local adaptation to climate

431 All four common garden traits exhibit linear phenotypic clines over many of the climatic  
432 gradients of the study area, where the strongest of these clines is autumn cold injury relative to  
433 autumn temperature (Figure 2C;  $r = 0.83$ ). To detect whether genetic clines for cold injury loci  
434 along environmental gradients are rangewide or localized, we examined the  $n = 80$ -locus subset of  
435 the 196 cold injury GPA candidates that are also moderately associated with the 19 climate  
436 variables (Random Forest pseudo- $R^2 > 0.31$ ; Figure S8). We clustered these 80 loci into six clusters  
437 based on their absolute PEA frequencies across provenances (Figure S9). The within-cluster mean  
438 PEA frequencies of these six clusters have distinct clines (Figure 5) relative to the gradient in  
439 autumn temperature across the study area (Figure 2). Clusters 2, 4, and 5 show no clinal variation

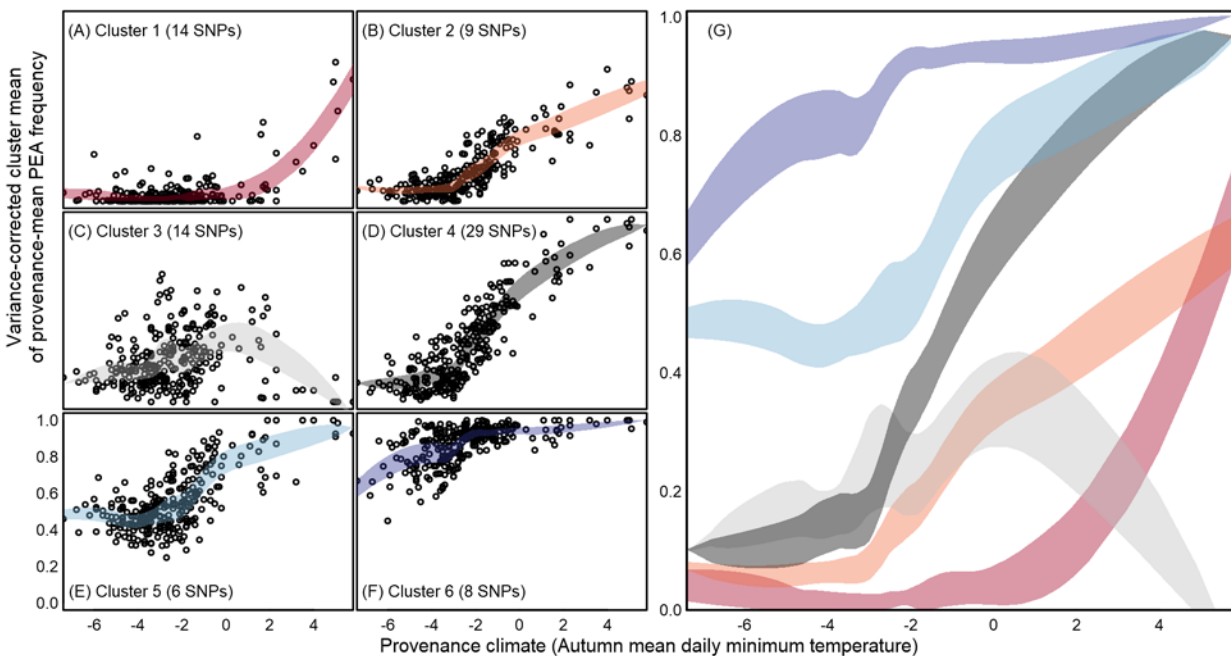

**FIGURE 5** Genetic clines associated with autumn cold injury. (A-F) the 80 climate-associated GWAS SNPs for autumn cold injury are clustered based on similarities in positive effect allele (PEA) frequencies across provenances ( $n=281$ ). Each point is the mean of the PEA frequencies across clustered SNPs for one provenance, with a correction applied to restore the variance of the PEA frequencies following averaging. The colored bands in each plot, superimposed in panel G, are locally-weighted 0.5-standard deviation prediction intervals. Recall that the y-axes are reflecting the frequency of PEAs that are associated with increased cold injury

## Evaluating genomic data for assisted gene flow

440 across provenance temperatures below  $-3^{\circ}\text{C}$ , but have a clinal increase in PEA frequency across  
441 higher temperatures (Figure 5). Cluster 6 has essentially the opposite pattern, in that it shows clinal  
442 variation almost exclusively below the  $-3^{\circ}\text{C}$  autumn temperature threshold. The adaptive variation  
443 in cluster 6 is of particular interest, in the context of standing variation, because it is localized to a  
444 high degree relative to the other clusters. Cluster 1 has an inverse pattern to cluster 6 relative to  
445 provenance climate, and primarily reflects variation associated with the coastal ssp. *contorta*,  
446 which occur at  $T_{\text{min\_at}} > 2^{\circ}\text{C}$ . Cluster 3 exhibits increased variation in the interior of BC, which  
447 appears to be reversed in the warmer climates of the coast.

448 To contrast the extent of rangewide vs localized clines, the geographic patterns of allele  
449 frequencies in clusters 4 and 6 are shown in Figure 6. Cluster 4 represents the dominant rangewide  
450 genetic cline over the study area, and is largely parallel with clusters 2 and 5. Cluster 6 is the  
451 complementary cline to cluster 4 as it reflects adaptive variation for cold hardiness in boreal  
452 provenances. Cluster 4 has a strong cline with respect to the joint thermal gradient of latitude and  
453 elevation (Figure 6C). Putatively adaptive alleles of cluster 6 are predominantly found in the Boreal  
454 climates of Northern Alberta, Northeastern BC, and the eastern foothills of the Rocky Mountains  
455 (Figure 6F). Unlike cluster 4, cluster 6 does not have a pronounced elevational cline at low latitudes  
456 (Figure 6D). With the exception of two coastal provenances, all provenances have standing  
457 variation in some of the adaptive alleles in each cluster, though several provenances west of the  
458 Rocky Mountains (i.e., in British Columbia) have no standing variation in at least half of the cluster  
459 6 loci (Figure S10).

## 460 **4 Discussion**

461 This study uses a large sample of locally adapted *P. contorta* provenances from across western  
462 Canada to evaluate genomic data, relative to phenotypic and climatic data, as a basis for assisted

## Evaluating genomic data for assisted gene flow

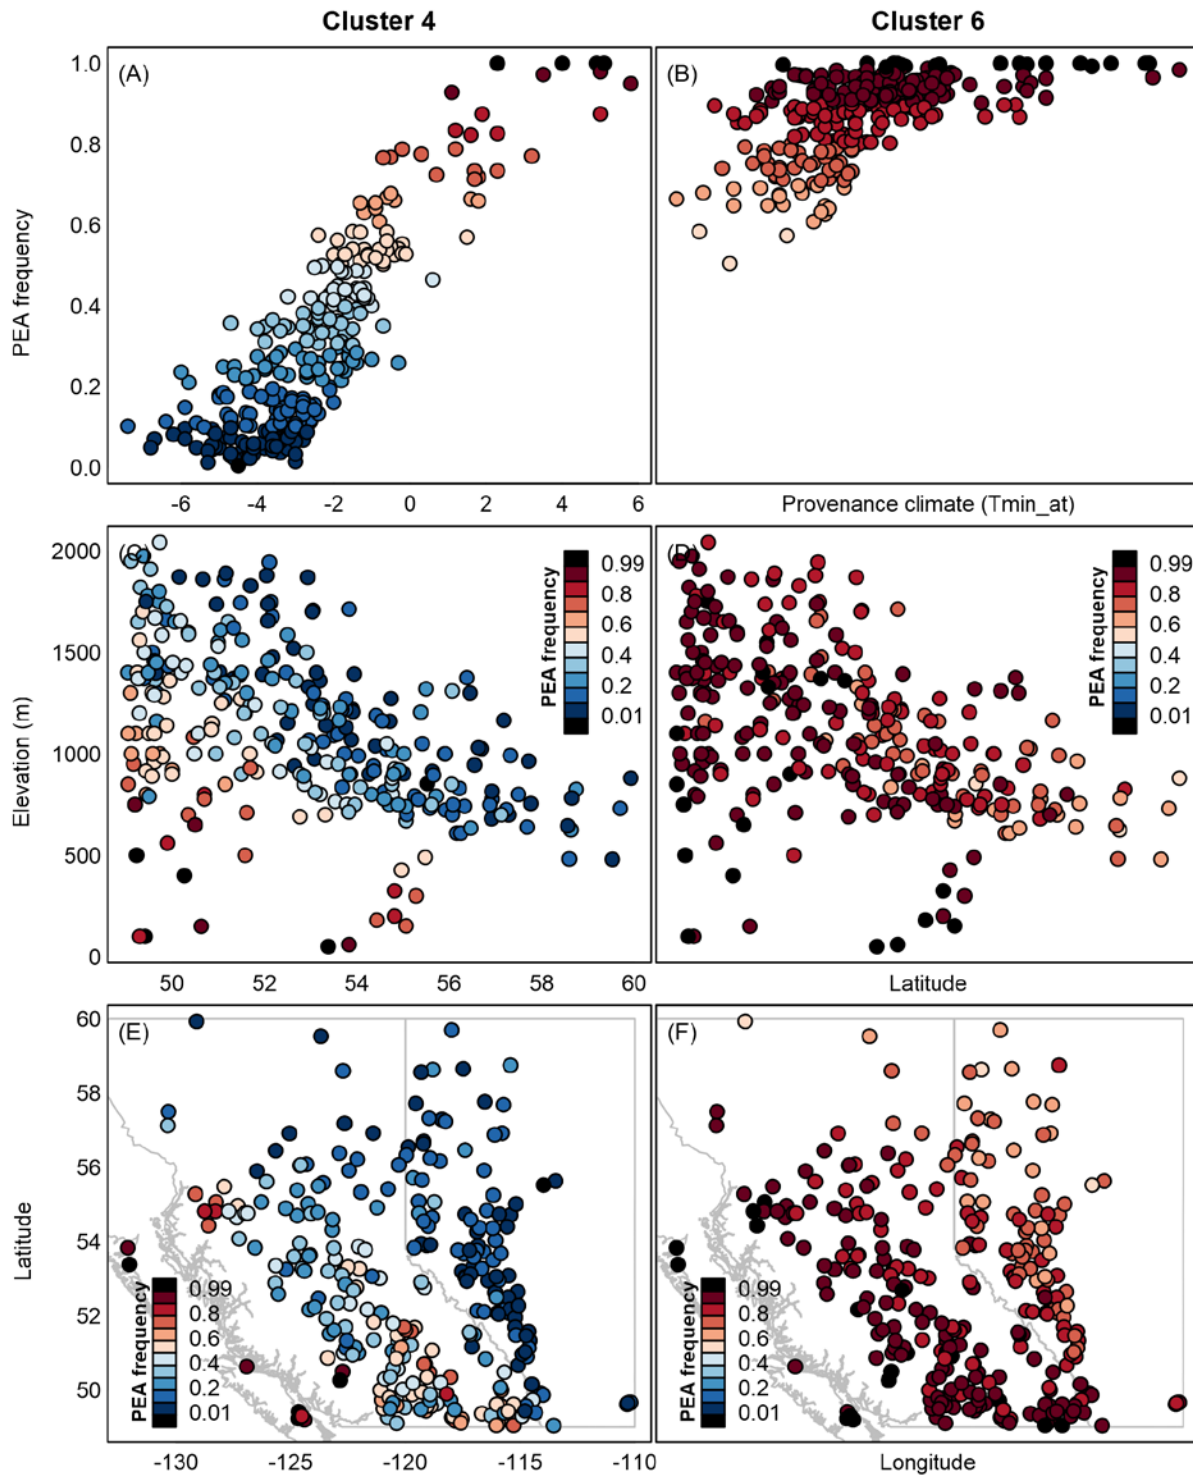

**FIGURE 6** Contrasting geographic patterns of standing variation in rangewide and localized genetic clines associated with autumn cold injury. A rangewide cline (Cluster 4, left column) and a localized cline (Cluster 6, right column) relative to the autumn temperature gradient (Tmin\_at) in the sampled provenances (A and B, respectively) as previously shown in Figure 4D & 4F. These clines are also compared across latitude and elevation (C,D), and latitude and longitude (E,F). Populations are colored with respect to PEA frequency (alleles that are associated with an increase in autumn cold injury).

## Evaluating genomic data for assisted gene flow

464 gene flow and genetic conservation. In the introduction, we posed three research questions related  
465 to this objective. The first was: *what is the relative value of genomic data vs. climatic and*  
466 *geographic data in explaining variation in locally adapted traits?* All data types identified the  
467 importance of adaptation to seasonally low temperatures driving population differentiation across  
468 western Canada. On average, the best predictors of seedling traits were the GPA SNPs, both the  
469 full set and the subset that was also associated with climate (Figure 3). For cold injury and growth  
470 cessation, the climate variables had similar predictive power to the GPA SNPs. For all traits, the  
471 neutral and GEA SNPs explained far less variation than climate, GPA SNPs or even geographic  
472 coordinates. This suggests that loci associated with climate-relevant traits within populations are  
473 both effective for revealing adaptive differences among populations, as well as elements of genetic  
474 architecture underlying adaptive responses that can be useful guiding management or conservation  
475 decisions.

476 The second question was: *can genomic data identify the climatic drivers of local adaptation?*  
477 Genotype-environment associations and a long-term provenance trial had strong agreement on the  
478 climatic drivers of local adaptation, namely winter temperature-related variables (Figure 4). These  
479 dominant drivers also held for short-term common garden seedling traits, though the overall  
480 relationship to the GEA result was weaker. This suggests that genomic data can be a viable option  
481 for identifying the key climatic controls on productivity and lifetime fitness, and may even be more  
482 reliable for this purpose than seedling traits in some contexts (Figure S11).

483 The third question was: *what is the spatial scale of local adaptation in climatically adaptive*  
484 *traits?* We found that some of the genetic clines associated with the observed phenotypic cline in  
485 cold injury are constrained to the extremes of the study area (Figure 5). However, we did not find  
486 compelling evidence for highly localized genetic clines at scales that would constrain local seed



## Evaluating genomic data for assisted gene flow

487 transfer to scales finer than those indicated by phenotypic data or necessitate geographically small  
488 genetic conservation units (Figures 5 and 6).

### 489 **4.1 Phenotypic variation explained by geographical, climatic, and genomic data.**

490 The predictive power of climate variables, geography, and genotypes varied greatly among  
491 seedling traits. It is widely recognized that cold hardiness shows strong population differentiation  
492 in most temperate and boreal species (Howe et al. 2003; Alberto et al. 2013; Aitken and Bemmels  
493 2016), and we found strong population differentiation for cold injury, as well as high predictability  
494 of cold injury from climatic, geographic, and GPA SNP data ( $PVE > 0.6$ ). However, the remaining  
495 traits were not strongly predicted with any of the given data ( $PVE < 0.5$ , Figure 3). Variability in  
496 the predictive ability among traits for a given data source, or among data sources for a given trait  
497 may be due to several factors, including (discussed in Lind et al. 2018): 1) how well each phenotype  
498 is correlated with lifetime fitness; 2) the degree to which the trait is polygenic; 3) the mode of gene  
499 action underlying the genetic architecture of the trait (e.g., additive, epistatic/GxE, or pleiotropic);  
500 4) the primary source of genetic variation in a trait (i.e., protein coding or regulatory regions); 5)  
501 the degree to which selection has structured variation within the species (i.e., the joint effects of  
502 selective forces and demographic dynamics); or 6) shortcomings of methodologies (e.g., correcting  
503 for population structure that could remove adaptive signals that covary with demography).

504 While this study focussed on relatively few seedling traits, there are undoubtedly many  
505 other traits at various life history stages that have population differences associated with local  
506 climate (e.g., biotic and abiotic responses, reproduction, and tree form). Our GPAs specifically  
507 identify SNPs associated with our focal seedling traits, and so it is not surprising that the GPA  
508 SNPs from individual seedling traits were better predictors of a given trait than the GEA SNPs  
509 (Figure 3). Even so, the GPA SNPs were consistently the best set of markers for explaining

## Evaluating genomic data for assisted gene flow

510 variation in phenotypes, and second only to climate for growth cessation and cold injury (Figure  
511 3), emphasizing the added value of these candidate loci. Climate also consistently explained  
512 phenotypic variation well, relative to genomic data, for traits other than growth initiation.  
513 Geographic coordinates (latitude, longitude, and elevation) predicted all seedling traits quite well,  
514 explaining the success found in the vast body of older genecological literature in forest trees that  
515 used geographic variables as a proxy for climate before spatial climatic data became widely  
516 available.

517 In line with expectations of polygenic architectures for most of the traits, the entire SNP  
518 array (~31K SNPs) was able to predict some of the variation in these traits. Neutral SNPs from  
519 non-coding regions of the genome were also able to explain a substantial portion of phenotypic  
520 variation in all traits except shoot mass (Figure 3), and were equivalent to all other data sources as  
521 a predictor set for Random Forest regressions (Figure S4). The predictive power of neutral SNPs  
522 emphasizes the potential to confound neutral population structure with adaptive variation, or to  
523 overcorrect for population structure and as a result, overlook adaptive markers, particularly for  
524 species whose demographic history is aligned with environmental gradients. In this case, the post-  
525 glacial expansion of lodgepole pine likely matches the strong latitudinal gradient of winter  
526 temperatures. Since the analyses identifying GEA and GPA SNPs both adjusted for population  
527 structure, we may have eliminated some loci involved in local adaptation from consideration  
528 through this adjustment.

### 529 **4.2 Climatic drivers of local adaptation**

530 To design an assisted gene flow strategy that matches populations with suitable sites based  
531 on current and near-future climates, it is important to understand the climatic factors that have  
532 driven local adaptation. Once the key climatic factors for local adaptation are identified, a climate

## Evaluating genomic data for assisted gene flow

533 distance metric can be constructed to match seed sources with sites (e.g., Climate-Based Seed  
534 Transfer, O'Neill 2017, and Seedlot Selection Tool, <https://seedlotselectiontool.org/sst/>). Our GEA  
535 results for individual climate variables ranked the variable importance similarly to those identified  
536 based on growth in a 20-year field provenance trial and, to a lesser extent, to our seedling common  
537 garden phenotypes. Both sets of phenotypic data identified winter temperature variables including  
538 mean coldest month temperature, degree days below 0°, and extreme minimum temperature as  
539 important drivers of local adaptation. Other studies of these provenances (e.g., Liepe et al. 2016)  
540 and other populations of lodgepole pine in western Canada (e.g., Rweyongeza et al. 2007; Wang  
541 et al. 2010; McLane et al. 2011) corroborate these climatic variables as strong historic drivers of  
542 adaptation and differentiation, and at relatively broad spatial scales (Liepe et al. 2016).  
543 Nevertheless, the result that our set of neutral markers produced nearly equivalent climate variable  
544 rankings to the GEA set (Figure 4 vs. Figure S7) indicates that the substitution of genomic for  
545 phenotypic data needs to be approached with some caution.

546 Future pressures from drought are expected to become increasingly relevant for lodgepole  
547 populations as climate change progresses throughout the next century (Monserud et al. 2006, 2008;  
548 McLane et al. 2011). GEA-climate relationships were stronger than field phenotype-climate  
549 relationships for summer precipitation-related variables such as mean summer precipitation and  
550 cumulative moisture deficit (Figure 4). This suggest that water availability might result in  
551 diversifying selection across populations. A previous study with these populations found no  
552 significant population variation for drought-related seedling traits including stable carbon isotope  
553 ratios and biomass allocation to roots (Liepe et al. 2016); however, it did not include populations  
554 from drier provenances in the southern portion of the species range, and these may show stronger  
555 drought adaptation. Interestingly, the seedling common garden phenotypes in this study from the

## Evaluating genomic data for assisted gene flow

556 mild, maritime Vancouver climate had stronger associations with summer heat-related variables  
557 than the genomic data (Figure 4a).

558         None of the phenotypes we analyzed represent lifetime fitness. Nonetheless, the  
559 concordance of climatic drivers of seedling phenotypes, 20-year growth in the field, and genomic  
560 data are encouraging (Figure 4). The closest proxy to fitness among the seedling traits we analyzed  
561 may be seedling shoot mass, as a measure of growth during the common garden experiment. Trees  
562 that achieve larger sizes within the available frost-free period for growth will generally have higher  
563 fecundity as they have larger crowns with more sites for pollen and seed cone production. Forest  
564 managers are also ultimately interested in tree size for wood production, and trees with good  
565 juvenile growth are likely to grow well in a restoration context. We found weaker population  
566 differentiation for shoot mass than for the other seedling traits. Tree size is the product of many  
567 other component traits affecting seedling health and vigour, including phenology (which we  
568 analyzed directly as growth initiation and cessation), abiotic stress tolerance (including cold  
569 injury), resistance to insects and diseases, resource acquisition and allocation, physiological  
570 processes, cell density, etc. It is likely that loci underlying variation in growth have pleiotropic  
571 effects, and that they respond to selection through trade-offs in the various fitness consequences of  
572 component traits contributing to growth.

573         Which of these data sources – seedling phenotypes, field phenotypes, or genotypes – should  
574 be considered the standard against which the others are compared? One could argue that field-  
575 based growth over two decades better reflects meaningful provenance differences expressed in  
576 typical habitat. On the other hand, the precision phenotyping of seedlings for phenology and cold  
577 hardiness is difficult or impossible in long-term field trials, and these traits should be strongly  
578 linked with climate for boreal, sub-boreal, and montane species. Finally, it may be that the GEA-

## Evaluating genomic data for assisted gene flow

579 climate patterns provide the best indication of long-term selection as they may reflect periodic,  
580 episodic extreme climatic events causing injury and mortality that are not observed even over long  
581 field experiments. In any event, given the extensive overlap in top climate variables among these  
582 methods, we suggest that GEA approaches can rapidly provide information on climatic drivers of  
583 local adaptation for the design of assisted gene flow strategies when phenotypic data are not  
584 available. However, the potential for population structure to confound GEA approaches remains  
585 an important consideration.

### 586 **4.3 *Spatial scale of local adaptation to climate***

587 We evaluated variation at adaptive loci against a model of localized versus rangewide genetic  
588 clines (Figure 1, *sensu* Barton 1999) along climatic temperature gradients (Figure 2). We found  
589 evidence of both localized and broad-scale genetic clines for clusters of SNPs associated with  
590 autumn cold injury (Figure 5 and Figure S8). Overall, the genetic clines associated with autumn  
591 cold injury do not exhibit the strongly sequential, localized clines envisioned by Barton (1999) and  
592 Savolainen et al. (2007), nor are all genetic clines coincident across the range of environments, but  
593 rather fit a model intermediate to the hypothetical scenarios illustrated in Figure 1B and 1C. Our  
594 study sampled provenances over only half of the species' latitudinal range. It may be that sequential  
595 localized genetic clines would be more evident if our study included the full species range. While  
596 some clines for the major adaptive clusters we identified are largely variable across the range, there  
597 is a group of six SNPs that all show clines in the boreal region of the study area, but not in warmer  
598 areas (cluster 6 in Figure 5). These clines complement those of several other clusters for SNPs that  
599 are relatively invariant in the boreal portion of the range but vary in warmer regions (clusters 1, 2,  
600 and 4 in Figure 5). For instance, cluster 6 alleles conferring cold hardiness (the alternate PEA allele)  
601 have reduced standing variation in warmer provenances west of the Rocky Mountains, and follow

## Evaluating genomic data for assisted gene flow

602 both elevational and latitudinal patterns of temperature clines (Figures 5 and 6). Failure to detect  
603 polymorphisms for these SNPs in these provenances may be an artefact of small sample sizes  
604 ( $6 < n < 13$ ) in a majority of the studied provenances (Figure S2). Nevertheless, these results indicate  
605 reduced genetic diversity for boreal-associated alleles of cluster 6. The absence of these alleles may  
606 be a limiting factor in seed transfer from sub-boreal to boreal climates, or across the Rocky  
607 Mountains. This localization may be indicative of alleles conferring additional cold hardiness in  
608 the coldest areas of the sampled range that may have trade-offs in the warmer areas (e.g., via  
609 pleiotropy or GxE such as conditional neutrality). Even so, the alleles in cluster 6 were not  
610 associated with the other phenotypes in our study (while all other clusters had associations to at  
611 least three phenotypes). Future investigation may be warranted, as the lack of pleiotropy inferred  
612 from associations to multiple phenotypes in cluster 6 may be a function of the cluster's sample  
613 size, of linkage to unsampled antagonistic (regulatory) sites, conditional neutrality underlying gene  
614 action (or other GxE), of unmeasured phenotypes important to adaptation, or of other statistical  
615 and methodological shortcomings.

616 While our results suggest that localized genetic clines (Figure 5), and provenances  
617 associated with low genetic diversity in adaptive alleles (Figures 6 and S8), are evident in lodgepole  
618 pine, we did not find compelling evidence for localized genetic clines at scales that would constrain  
619 local seed transfer more narrowly than previous estimates of adaptive scales based on phenotypes  
620 (*cf.* Figure 4 in Liepe et al. 2016; Wang et al. 2010; Ukrainetz et al. 2018) or current seed transfer  
621 policy would suggest (Ying and Yanchuk 2006; O'Neill et al. 2017), nor at scales that would  
622 necessitate highly localized spatial genetic conservation units. At present, British Columbia's  
623 genetic conservation program for forest trees uses British Columbia's 16 Biogeoclimatic  
624 Ecological Classification (BEC) zones to assess adequacy of both *in situ* (Hamann et al. 2004;

## Evaluating genomic data for assisted gene flow

625 Chourmouzis et al. 2009) and *ex situ* (Krakowski et al. 2009) genetic conservation for all 50 of  
626 BC's native tree species. If other species show patterns of distribution of adaptive diversity similar  
627 to lodgepole pine, continued management of conservation populations within these ecological  
628 zones should be sufficient (Liepe et al. 2016).

629 Climate-based local adaptation has long been observed for many plant species (Leimu and  
630 Fisher 2008; Hereford 2009) including conifers (Langlet 1971; Savolainen et al. 2007; Boshier et  
631 al. 2015; Lind et al. 2018), the scale of which is determined by the interplay between migration,  
632 selection, and drift (discussed in Lenormand 2002, Tigano & Friesen 2016). Historically, the spatial  
633 scales over which local adaptation occurs has been inferred from both short- and long-term  
634 transplant experiments (Langlet 1971; Morgenstern 1996). Only recently has the technology been  
635 available to study the spatial distribution of adaptive variation at loci across the genome. This new  
636 source of insight into local adaptation comes at a time when climate change creates an imperative  
637 for mitigating inevitable risks of productivity loss and threats to natural populations across forestry,  
638 agricultural, and natural systems. The common sources of data used towards such purposes, such  
639 as field provenance trials, seedling common gardens, scale-free spatial climatic data, and genomic  
640 studies, however, come with varied logistical limitations and are not always feasible or appropriate  
641 in every situation (Blanquardt et al. 2013; Sork et al. 2013; Gibson et al. 2016; Hoban et al. 2016;  
642 Flanagan et al. 2018). The large number of phenotyped and genotyped provenances in this study  
643 allow us to quantify and compare detailed spatial and climatic patterns of adaptive variation, and  
644 to assess their utility for planning assisted gene flow, the need for *in situ* and *ex situ* genetic  
645 conservation, and the potential for populations to adapt to new climates without intervention. While  
646 our data are for lodgepole pine, we hope these results will inform and accelerate climate adaptation  
647 efforts with other widespread species.

648 **Acknowledgements**

649 This research used data generated by the AdapTree Project (S.N.A. and Andreas Hamann, co-  
650 project leaders), and was analyzed as part of the CoAdapTree Project. These projects were  
651 funded by Genome Canada, Genome BC, with co-funding from Alberta Innovates Bio Solutions,  
652 the BC Ministry of Forests, Lands and Natural Resources Operations, and the Forest Genetics  
653 Council of BC (a full list of sponsors is available at <http://coadapttree.forestry.ubc.ca/sponsors/>).  
654 Support for C.M. was also provided by a grant to S.N.A. from the Forest Genetics Council of  
655 British Columbia and an NSERC Discovery Grant to S.N.A. Seedlots were provided by 63  
656 government agencies and forest companies (listed at [http://adapttree.forestry.ubc.ca/seed-](http://adapttree.forestry.ubc.ca/seed-contributors/)  
657 [contributors/](http://adapttree.forestry.ubc.ca/seed-contributors/)). Thanks to Kristin Nurkowski, Robin Mellway and Pia Smets for laboratory work  
658 including DNA extraction and phenotyping. The lodgepole pine SNP array was designed based  
659 on analyses by Sam Yeaman, Kay Hodgins, and Katie Lotterhos, with assistance and support  
660 from Affymetrix. The BC Ministry of Forests, Lands and Natural Resource Operations provided  
661 data from the Illingworth Provenance Trial. Additional technical assistance and suggestions for  
662 this manuscript were provided by members of the AdapTree and CoAdapTree teams and Aitken  
663 lab members. We thank Sam Yeaman for providing comments on an earlier version of this  
664 manuscript.

665 **Author contributions:**

666 SNA and CRM conceived this project. Common garden experiments and phenotyping by IRM.  
667 SNP tables compiled by JBY and IRM. Analyses designed by CRM with input from IRM, SNA,  
668 and BML. GPA by IRM. GEA by BML. Figures by CRM. Analysis of Illingworth trial by TW.  
669 Introduction by SNA, BML, CRM and JBY. Methods by IRM and CRM. Results by CRM.  
670 Discussion by CRM, SNA, BML and JBY. Supporting information document by CRM.  
671

672 **Archiving statement:**

673 Data for this study will be made publicly available upon acceptance.



674 **References**

- 675 Aguirre-Gutiérrez, J., H.M. Serna-Chavez, A.R. Villalobos-Arambula, J.A. Pérez de la Rosa, and  
676 N. Raes. 2015. Similar but not equivalent: ecological niche comparison across closely-  
677 related Mexican white pines. *Diversity and distributions* 21:245-257. DOI:  
678 <https://doi.org/10.1111/ddi.12268>
- 679 Aitken, S.N., and J.B. Bemmels. 2016. Time to get moving: assisted gene flow of forest trees.  
680 *Evolutionary Applications* 9:271–290. DOI: <https://doi.org/10.1111/eva.12293>
- 681 Aitken S.N., and M.C. Whitlock. 2013. Assisted gene flow to facilitate local adaptation to  
682 climate change. *Annual Review of Ecology, Evolution, and Systematics* 44:367–388. DOI:  
683 <https://doi.org/10.1146/annurev-ecolsys-110512-135747>
- 684 Aitken, S.N., S. Yeaman, J.A. Holliday, T. Wang, and S. Curtis-McLane. 2008. Adaptation,  
685 migration or extirpation: climate change outcomes for tree populations. *Evolutionary*  
686 *Applications* 1:95–111. DOI: <https://doi.org/10.1111/j.1752-4571.2007.00013.x>
- 687 Alberto, F.J., S.N. Aitken, and R. Alía. 2013. Potential for evolutionary responses to climate  
688 change—evidence from tree populations. *Global Change Biology* 19:1645–1661. DOI:  
689 <https://doi.org/10.1111/gcb.12181>
- 690 Allen, C.D., A.K. Macalady, H. Chenchouni et al. 2010. A global overview of drought and heat-  
691 induced tree mortality reveals emerging climate change risks for forests. *Forest Ecology*  
692 *and Management* 259:660–684. DOI: <https://doi.org/10.1016/j.foreco.2009.09.001>
- 693 Anderegg, W.R.L., J.A. Hicke, R.A. Fisher, C.D. Allen, J. Aukema, B. Bentz, S. Hood, J.W.  
694 Lichstein, A.K. Macalady, N. McDowell, Y. Pan, K. Raffa, A. Sala, D.J. Shaw, N.L.  
695 Stephenson, C. Tague, and M. Zeppel. 2015. Tree mortality from drought, insects, and their  
696 interactions in a changing climate. *New Phytologist* 208:674–683. DOI:  
697 <https://doi.org/10.1111/nph.13477>
- 698 Bansal, S., C.A. Harrington, and J.B. St. Clair. 2016. Tolerance to multiple climate stressors: a  
699 case study of Douglas-fir drought and cold hardiness. *Ecology and Evolution* 6: 2074-2083.  
700 DOI: <https://doi.org/10.1002/ece3.2007>
- 701 Barton, N.H. (1999) Clines in polygenic traits. *Genetics Research* 74:223–236. DOI:  
702 <https://doi.org/10.1017/S001667239900422X>
- 703 Blanquart, F., O. Kaltz, S.L. Nuismer, and S. Gandon. 2013. A practical guide to measuring local  
704 adaptation. *Ecology Letters* 16:1195-1205. DOI: <https://doi.org/10.1111/ele.12150>
- 705 Breiman, L. (2001) Random forests. *Machine Learning* 45:5–32.
- 706 Buotte, P.C., S. Levis, B.E. Law, T.W. Hudiburg, D.E. Rupp, and J.J. Kent. 2018. Near-future  
707 forest vulnerability to drought and fire varies across the western United States. *Global*  
708 *Change Biology* 25:290-303. DOI: <https://doi.org/10.1111/gcb.14490>
- 709 Butler, D., (2009). ASReml: ASReml() fits the linear mixed model. R package version 3.0.
- 710 Campbell, R. K. 1986. Mapped genetic variation of Douglas-fir to guide seed transfer in  
711 southwest Oregon. *Silvae Genetica* 35:85-96.
- 712 Coop, G., D. Witonsky, A. Di Rienzo, and J. K. Pritchard. 2010. Using environmental  
713 correlations to identify loci underlying local adaptation. *Genetics* 185:1411–1423. DOI:  
714 <https://doi.org/10.1534/genetics.110.114819>
- 715 Cornelius, J. 1994. Heritabilities and additive genetic coefficients of variation in forest trees.

## Evaluating genomic data for assisted gene flow

- 716 Canadian Journal of Forest Research **24**:372–379.
- 717 Davis, M.B., and R.G. Shaw. 2001. Range shifts and adaptive responses to quaternary climate  
718 change. *Science* **292**:673– 679. DOI: <https://doi.org/10.1126/science.292.5517.673>
- 719 Daly, C., R.P. Neilson, and D.L. Phillips. 1994. A statistical-topographic model for mapping  
720 climatological precipitation over mountainous terrain. *Journal of Applied Meteorology*  
721 **33**:140–158. DOI: [https://doi.org/10.1175/1520-0450\(1994\)033<0140:ASTMFM>2.0.CO;2](https://doi.org/10.1175/1520-0450(1994)033<0140:ASTMFM>2.0.CO;2)
- 722 De La Torre, A.R., Z. Li, Y. Van de Peer, and P.K. Ingvarsson. 2017. Contrasting Rates of  
723 Molecular Evolution and Patterns of Selection among Gymnosperms and Flowering Plants.  
724 *Molecular Biology and Evolution* **34**:1363–1377. DOI:  
725 <https://doi.org/10.1093/molbev/msx069>
- 726 De Mita, S., A-C. Thuillet, L. Gay, N. Ahmadi, S. Manel, J. Ronfort, and Y. Vigouroux. 2013.  
727 Detecting selection along environmental gradients: analysis of eight methods and their  
728 effectiveness for out-breeding and selfing populations. *Molecular Ecology* **22**:1383–1399.  
729 DOI: <https://doi.org/10.1111/mec.12182>
- 730 de Villemereuil, P., O.E. Gaggiotti, M. Mouterde, and I. Till-Bottraud. 2015. Common garden  
731 experiments in the genomic era: new perspectives and opportunities. *Heredity* **116**:249-254.  
732 DOI: <https://doi.org/10.1038/hdy.2015.93>
- 733 Donohue, K., R. Rubio de Casas, L. Burghardt, K. Kovach, and C.G. Willis. 2010. Germination,  
734 post-germination adaptation, and species ecological ranges. *Annual Review of Ecology and*  
735 *Evolutionary Systematics* **41**:293–319. DOI: <https://doi.org/10.1146/annurev-ecolsys-102209-144715>
- 736
- 737 Eckert, A.J., D.E. Harwood, B.M. Lind, E.M. Hobson, A.D. Mix, P.E. Maloney, and C.J.  
738 Friedline. 2016. The genetic architecture of local adaptation II: The QTL landscape of  
739 water-use efficiency for foxtail pine (*Pinus balfouriana* Grev. & Balf.). bioRxiv.  
740 <https://doi.org/10.1101/038240>
- 741 Endler, J. A. 1977. Geographic variation, speciation and clines. Princeton Univ. Press,  
742 Princeton, NJ.
- 743 Exposito-Alonso, M., F. Vasseur, W. Ding, 2018, G. Wang, H. A. Burbano, and D. Weigel.  
744 2017. Genomic basis and evolutionary potential for extreme drought adaptation in  
745 *Arabidopsis thaliana*. *Nature Ecology & Evolution* **2**:352–358. DOI:  
746 <https://doi.org/10.1038/s41559-017-0423-0>
- 747 Forester, B.R., M.R. Jones, S. Joost, E.L. Landguth, and J.R. Lasky. 2015. Detecting spatial  
748 genetic signatures of local adaptation in heterogeneous landscapes. *Molecular Ecology*  
749 **25**:104–120. DOI: <http://doi.wiley.com/10.1111/mec.13476>
- 750 Frank, A., G.T. Howe, C. Sperisen, P. Brang, J.B. St. Clair, D.R. Schmatz, and C. Heiri. 2017.  
751 Risk of genetic maladaptation due to climate change in three major European tree species.  
752 *Global Change Biology* **23**:5358-5371. DOI: <https://doi.org/10.1111/gcb.13802>
- 753 Flanagan, S.P., B.R. Forester, E.K. Latch, S.N. Saitken, and S. Hoban. 2018. Guidelines for  
754 planning genomic assessment and monitoring of locally adaptive variation to inform species  
755 conservation. *Evolutionary Applications* **11**:1035-1052. DOI:  
756 <https://doi.org/10.1111/eva.12569>
- 757 Gibson, A.L., E.K. Espeland, V. Wagner, and C.R. Nelson. 2016. Can local adaptation research  
758 in plants inform selection of native plant materials? An analysis of experimental  
759 methodologies. *Evolutionary Applications* **9**:1219–1228.

- 760 <http://doi.wiley.com/10.1111/eva.12379>
- 761 Gray, L. K., & Hamann, A. (2013). Tracking suitable habitat for tree populations under climate  
762 change in western North America. *Climatic Change*, 117, 289–303.  
763 <https://doi.org/10.1007/s10584-012-0548-8>
- 764 Günther, T., and G. Coop. 2013. Robust identification of local adaptation from allele frequencies.  
765 *Genetics* **195**:205–220. DOI: <https://doi.org/10.1534/genetics.113.152462>
- 766 Hannerz, M., S.N. Aitken, J.N. King, and S. Budge. 1999. Effects of genetic selection for growth  
767 on frost hardiness in western hemlock. *Canadian Journal of Forest Research* **516**:509–516.  
768 DOI: <https://doi.org/10.1139/x99-019>
- 769 Hereford, J. 2009. A Quantitative Survey of Local Adaptation and Fitness Trade-Offs. *The*  
770 *American Naturalist* **173**:579–588. DOI: <http://www.jstor.org/stable/10.1086/597611>
- 771 Hoban, S., J. L. Kelley, K. E. Lotterhos, M. F. Antolin, G. Bradburd, D. B. Lowry, M. L. Poss, L.  
772 K. Reed, A. Storfer, and M. C. Whitlock. 2016. Finding the Genomic Basis of Local  
773 Adaptation: Pitfalls, Practical Solutions, and Future Directions. *The American Naturalist*  
774 **188**:379–397. <https://doi.org/10.1086/688018>
- 775 Holliday, J.A., S.N. Aitken, J.E.K. Cooke et al. 2017. Advances in ecological genomics in forest  
776 trees and applications to genetic resources conservation and breeding. *Molecular Ecology*  
777 **26**:706–717. DOI: <https://doi.org/10.1111/mec.13963>
- 778 Howe, G. T., S. N. Aitken, D. B. Neale, K. D. Jermstad, N. C. Wheeler, and T. H. Chen. 2003.  
779 From genotype to phenotype: unraveling the complexities of cold adaptation in forest trees.  
780 *Canadian Journal of Botany*. **81**:1247–1266. DOI: <https://doi.org/10.1139/b03-141>
- 781 Kawecki, T. J. 2008. Adaptation to Marginal Habitats. *Annual Review of Ecology, Evolution,*  
782 *and Systematics* 39:321–342. DOI: <https://10.1146/annurev.ecolsys.38.091206.095622>
- 783 Kawecki, T.J., and D. Ebert. 2004. Conceptual issues in local adaptation. *Ecology Letters*  
784 **7**:1225–1241. DOI: <https://doi.org/10.1111/j.1461-0248.2004.00684.x>
- 785 Kelly, E. and Phillips, B.L. 2016. Targeted gene flow for conservation. *Conservation biology*  
786 **30**:259–267. <https://doi.org/10.1111/cobi.12623>
- 787 Kremer, A., O. Ronce, J. J. Robledo-Arnuncio, F. Guillaume, G. Bohrer, R. Nathan, J. R. Bridle,  
788 R. Gomulkiewicz, E. K. Klein, K. Ritland, A. Kuparinen, S. Gerber, and S. Schueler. 2012.  
789 Long-distance gene flow and adaptation of forest trees to rapid climate change. *Ecology*  
790 *Letters* **15**:378–392. <http://doi.wiley.com/10.1111/j.1461-0248.2012.01746.x>
- 791 Langlet, O. 1971. Two hundred years genecology. *Taxon* 20:653–721.
- 792 Lenormand, T. 2002. Gene flow and the limits to natural selection. *Trends in Ecology &*  
793 *Evolution* **17**:183–189. DOI: [https://doi.org/10.1016/S0169-5347\(02\)02497-7](https://doi.org/10.1016/S0169-5347(02)02497-7)
- 794 Leimu, R., and M. Fischer. 2008. A meta-analysis of local adaptation in plants. *PLoS ONE*  
795 **3**:e4010. DOI: <http://dx.plos.org/10.1371/journal.pone.0004010.s001>
- 796 Leites, L. P., Robinson, A. P., Rehfeldt, G. E., Marshall, J. D., & Crookston, N. L. (2012).  
797 Height-growth response to changes in climate differ among populations of interior Douglas-  
798 fir: a novel analysis of provenance-test data. *Ecological Applications*, 22(1), 154–165.  
799 <https://doi.org/10.1890/11-0150.1>
- 800 Li, Y., X-X. Zhang, R-L Mao, J. Yang, C-Y. Miao, Z. Li, and Y-X. Qiu. 2017. Ten years of  
801 landscape genomics: Challenges and opportunities. *Frontiers in Plant Science*. **8**:2136 DOI:  
802 <https://doi.org/10.3389/fpls.2017.02136>

## Evaluating genomic data for assisted gene flow

- 803 Liepe, K.J., A. Hamann, P. Smets, C.R. Fitzpatrick, and S.N. Aitken. 2016. Adaptation of  
804 lodgepole pine and interior spruce to climate: implications for reforestation in a warming  
805 world. *Evolutionary applications*, **9**:409-419. DOI: <https://doi.org/10.1111/eva.12345>
- 806 Lind, B.M., M. Menon, C.E. Bolte, T.M. Faske, and A.J. Eckert. 2018. The genomics of local  
807 adaptation in trees: are we out of the woods yet? *Tree Genetics & Genomes* **14**:29. DOI:  
808 <https://doi.org/10.1007/s11295-017-1224-y>
- 809 Lotterhos, K.E., S. Yeaman, J.C. Degner, S.A. Aitken, and K.A. Hodgins. 2018. Modularity of  
810 genes involved in local adaptation to climate despite physical linkage. *Genome Biology*  
811 **19**:157. DOI: <https://doi.org/10.1186/s13059-018-1545-7>
- 812 Lunt, I. D., M. Byrne, J. J. Hellmann, N. J. Mitchell, S. T. Garnett, M. W. Hayward, T. G.  
813 Martin, E. McDonald-Madden, S. E. Williams, and K. K. Zander. 2013. Using assisted  
814 colonisation to conserve biodiversity and restore ecosystem function under climate change.  
815 *Biological conservation* **157**: 172-177. DOI: <https://doi.org/10.1016/j.biocon.2012.08.034>
- 816 Mackay, T.F.C., E.A. Stone, and J.F. Ayroles. 2009. The genetics of quantitative traits:  
817 challenges and prospects. *Nature Reviews Genetics* **10**:565–577. DOI:  
818 <https://doi.org/10.1038/nrg2612>
- 819 MacLachlan, I.R., T. Wang, A. Hamann, P. Smets, and S.N. Aitken. 2017. Selective breeding of  
820 lodgepole pine increases growth and maintains climatic adaptation. *Forest Ecology and*  
821 *Management* **391**:404–416. DOI: <https://doi.org/10.1890/04-1036>
- 822 Mähler, N., J. Wang, B.K. Terebienieć, P.K. Ingvarsson, N.R. Street, and T.R. Hvidsten. 2017.  
823 Gene co-expression network connectivity is an important determinant of selective  
824 constraint. *PLoS Genetics* **13**:e1006402. DOI: <https://doi.org/10.1371/journal.pgen.1006402>
- 825 Matyas, C. 1994. Modeling climate change effects with provenance test data. *Tree Physiology*  
826 **14**:797–804.
- 827 McDowell, N.G., and C.D. Allen. 2015. Darcy's law predicts widespread forest mortality under  
828 climate warming. *Nature Climate Change* **5**:669. DOI:  
829 <https://doi.org/10.1038/NCLIMATE2641>
- 830 McKenney, D. W., J. H. Pedlar, K. Lawrence, K. Campbell, and M. F. Hutchinson. 2007.  
831 Potential impacts of climate change on the distribution of North American trees. *BioScience*  
832 **57**:939–948. DOI: <https://doi.org/10.1641/B571106>
- 833 McLachlan, J.S., J.S. Clark, and P.S. Manos. 2005. Molecular indicators of tree migration  
834 capacity under rapid climate change. *Ecology* **86**:2088–2098. DOI:  
835 <https://doi.org/10.1890/04-1036>
- 836 McLane, S.C., L.D. Daniels, and S.N. Aitken. 2011. Climate impacts on lodgepole pine (*Pinus*  
837 *contorta*) radial growth in a provenance experiment. *Forest Ecology and Management*,  
838 **262**:115-123. DOI: <https://doi.org/10.1016/j.foreco.2011.03.007>
- 839 McGraw, J. B., Turner, J. B., Souther, S., Bennington, C. C., Vavrek, M. C., Shaver, G. R., &  
840 Fetcher, N. (2015). Northward displacement of optimal climate conditions for ecotypes of  
841 *Eriophorum vaginatum* L. across a latitudinal gradient in Alaska. *Global Change Biology*,  
842 **21**(10), 3827–3835. <https://doi.org/10.1111/gcb.12991>
- 843 Mitton, J.B., and C.G. Williams. 2006. Gene flow in conifers. In: Williams CG (ed) *Landscapes,*  
844 *genomics, and transgenic conifers.* Springer Netherlands, Dordrecht, pp 147–168
- 845 Monserud, R.A., S. Huang, and Y. Yang. 2006. Predicting lodgepole pine site index from

## Evaluating genomic data for assisted gene flow

- 846 climatic parameters in Alberta. *The Forestry Chronicle* **82**:562-571. DOI:  
847 <https://doi.org/10.5558/tfc82562-4>
- 848 Monserud, R.A., Y. Yang, S. Huang, and N. Tchebakova. 2008. Potential change in lodgepole  
849 pine site index and distribution under climatic change in Alberta. *Canadian Journal of*  
850 *Forest Research* **38**:343-352. DOI: <https://doi.org/10.1139/X07-166>
- 851 Montwé, D., Isaac-Renton, M., Hamann, A., & Spiecker, H. (2018). Cold adaptation recorded in  
852 tree rings highlights risks associated with climate change and assisted migration. *Nature*  
853 *Communications* **9**:1–7. <https://doi.org/10.1038/s41467-018-04039-5>
- 854 Morgenstern, E.K. 1996, Geographic variation in forest trees: genetic basis and application of  
855 knowledge in silviculture. UBC press.
- 856 Neale, D.B, and O. Savolainen. 2004. Association genetics of complex traits in conifers. *Trends*  
857 *in Plant Science* **9**:325–330. DOI: <https://doi.org/10.1016/j.tplants.2004.05.006>
- 858 Neale, D. B., J. L. Wegrzyn, K. A. Stevens, A. V. Zimin, D. Puiu, M. W. Crepeau, et al. 2014.  
859 Decoding the massive genome of loblolly pine using haploid DNA and novel assembly  
860 strategies. *Genome Biology* **15**:1–13. DOI: <https://doi.org/10.1186/gb-2014-15-3-r59>
- 861 O’Neill, G., A. Hamann, and T. Wang. 2008. Accounting for population variation improves  
862 estimates of climate change impacts on species’ growth and distribution. *Journal of Applied*  
863 *Ecology* **45**:1040–1049.
- 864 O’Neill, G. A., Wang, T., Ukrainetz, N., Charleson, L., Mcauley, L., Yanchuk, A., & Zedel, S.  
865 (2017). A Proposed Climate-based Seed Transfer System for British Columbia. Prov. B.C.,  
866 Victoria, B.C. Tech. Rep. 099.
- 867 Parchman, T.L., J.P. Jahner, K.A. Uckele, L.M. Galland, and A.J. Eckert AJ. 2018. RADseq  
868 approaches and applications for forest tree genetics. *Tree Genetics & Genomes* **14**:39. DOI:  
869 <https://doi.org/10.1007/s11295-018-1251-3>
- 870 Parmesan, C. (2006). Ecological and Evolutionary Responses to Recent Climate Change. *Annual*  
871 *Review of Ecology, Evolution, and Systematics*, **37**(1), 637–669.  
872 <https://doi.org/10.1146/annurev.ecolsys.37.091305.110100>
- 873 Petit, R.J., and A. Hampe. 2006. Some evolutionary consequences of being a tree. *Annual*  
874 *Review of Ecology, Evolution, and Systematics* **37**:187–214. DOI:  
875 <https://doi.org/10.1146/annurev.ecolsys.37.091305.110215>
- 876 Postma, F.M., and J. Ågren. 2016. Early life stages contribute strongly to local adaptation in  
877 *Arabidopsis thaliana*. *Proceedings of the National Academy of Sciences* **113**:7590–7595.  
878 DOI: <https://doi.org/10.1073/pnas.1606303113>
- 879 Prada, E., J. Climent, R. Alía, and R. Díaz. 2016. Life-history correlations with seasonal cold  
880 hardiness in maritime pine. *American Journal of Botany* **103**:2126-2135. DOI:  
881 <https://doi.org/10.3732/ajb.1600286>
- 882 Pritchard, J.K., and A. Di Rienzo. 2010. Adaptation – not by sweeps alone. *Nature Reviews*  
883 *Genetics*, **11**:665–667. DOI: <https://doi.org/10.1038/nrg2880>
- 884 Prunier, J., J-P Verta, and J.J. MacKay. 2015. Conifer genomics and adaptation: at the crossroads  
885 of genetic diversity and genome function. *New Phytol* **209**:44–62. DOI:  
886 <https://doi.org/10.1111/nph.13565>
- 887 R Core Team (2017). R: A language and environment for statistical computing. R Foundation for  
888 Statistical Computing, Vienna, Austria. URL <https://www.R-project.org/>.

## Evaluating genomic data for assisted gene flow

- 889 Rehfeldt, G. E., C. C. Ying, D. L. Spittlehouse, and D. A. Hamilton. 1999. Genetic responses to  
890 climate in *Pinus contorta*: niche breadth, climate change, and reforestation. *Ecological*  
891 *Monographs* 69:375–407.
- 892 Rellstab, C., Z.B. Dauphin, S. Zoller, S. Brodbeck, and F. Gugerli. 2018. Using transcriptome  
893 sequencing and pooled exome capture to study local adaptation in the giga-genome of *Pinus*  
894 *cembra*. *Molecular Ecology Resources AOP*. DOI: [https://doi.org/10.1111/1755-](https://doi.org/10.1111/1755-0998.12986)  
895 [0998.12986](https://doi.org/10.1111/1755-0998.12986)
- 896 Rellstab, C., F. Gugerli, A.J. Eckert, A.M. Hancock, and R. Holdregger. 2015. A practical guide  
897 to environmental association analysis in landscape genomics. *Molecular Ecology* 24:4348–  
898 4370. DOI: <https://doi.org/10.1111/mec.13322>
- 899 Reyer, C.P.O., A. Rammig, N. Brouwers, and F. Langerwisch. 2015. Forest resilience, tipping  
900 points and global change processes. *Journal of Ecology* 103:1-4. DOI:  
901 <https://doi.org/10.1111/1365-2745.12342>
- 902 Roberds, J.H., and G. Namkoong. 1989 Population selection to maximize value in an  
903 environmental gradient. *Theoretical and Applied Genetics* 77:128-134.
- 904 Rweyongeza, D.M., N.K. Dhir, L.K. Barnhardt, C. Hansen, and R.C. Yang. 2007. Population  
905 differentiation of the lodgepole pine (*Pinus contorta*) and jack pine (*Pinus banksiana*)  
906 complex in Alberta: growth, survival, and responses to climate. *Botany* 85:545-556. DOI:  
907 <https://doi.org/10.1139/B07-053>
- 908 Savolainen, O., T. Pyhäjärvi, and T. Knurr. 2007. Gene Flow and Local Adaptation in Trees.  
909 *Annual Review of Ecology, Evolution, and Systematics* 38:595–619. DOI:  
910 <https://doi.org/10.1146/annurev.ecolsys.38.091206.095646>
- 911 Schoville, S.D., A. Bonin, O. Francois et al. 2012. Adaptive genetic variation on the landscape:  
912 methods and cases. *Annual Review of Ecology, Evolution, and Systematics* 43:23–43.  
913 <https://doi.org/10.1146/annurev-ecolsys-110411-160248>
- 914 Sebastian, -Azcona J, A. Hamann, U.G. Hacke, and D. Rweyongeza. 2019. Survival, growth and  
915 cold hardiness tradeoffs in white spruce populations: Implications for assisted migration.  
916 *Forest Ecology & Management* 433:544-552. DOI:  
917 <https://doi.org/10.1016/j.foreco.2018.10.046>
- 918 Shafer, A. B. A., J. B. W. Wolf, P. C. Alves, L. Bergström, M. W. Bruford, I. Brännström, G.  
919 Colling, et al. 2015. Genomics and the challenging translation into conservation practice.  
920 *Trends in Ecology & Evolution* 30:78–87. DOI: <https://doi.org/10.1016/j.tree.2014.11.009>
- 921 Sork, V. 2018. Genomic studies of local adaptation in natural plant populations. *Journal of*  
922 *Heredity* 109:3-15. DOI: <https://doi.org/10.1093/jhered/esx091>
- 923 Sork, V.L., S.N. Aitken, R.J. Dyer, A.J. Eckert, P. Legendre, and D.B. Neale. 2013. Putting the  
924 landscape into the genomics of trees: approaches for understanding local adaptation and  
925 population responses to changing climate. *Tree Genet Genomes* 9:901–911. DOI:  
926 <https://doi.org/10.1007/s11295-013-0596-x>
- 927 Suren, H., K.A. Hodgins, S. Yeaman, K.A. Nurkowski, P. Smets, L.H. Rieseberg, S.N. Aitken,  
928 and J.A. Holliday. 2016. Exome capture from the spruce and pine giga-genomes. *Molecular*  
929 *Ecology Resources* 16:1136-1146. DOI: <https://doi.org/10.1111/1755-0998.12570>
- 930 Tigano, A., and V. L. Friesen. 2016. Genomics of local adaptation with gene flow. *Molecular*  
931 *Ecology* 25:2144–2164. DOI: <https://doi.org/10.1111/mec.13606>

## Evaluating genomic data for assisted gene flow

- 932 Ukrainetz, N.K., A.D. Yanchuk and S.D Mansfield. 2018. Climatic drivers of genotype-  
933 environment interactions in lodgepole pine based on multi-environment trial data and a  
934 factor analytic model of additive covariance. *Can. J. For. Res* 48: 835-854.
- 935 van Mantgem P.J., N.L. Stephenson, J.C. Byrne et al. 2009. Widespread increase of tree mortality  
936 in the western United States. *Science* 323:521–524. DOI:  
937 <https://doi.org/10.1126/science.1165000>
- 938 Wadgymar, S.M., M.N. Cumming, and A.E.Weis. 2015. The success of assisted colonization and  
939 assisted gene flow depends on phenology. *Global change biology* 21:3786-3799. DOI:  
940 <https://doi.org/10.1111/gcb.12988>
- 941 Wadgymar, S. M., D. B. Lowry, B. A. Gould, C. N. Byron, R. M. Mactavish, and J. T. Anderson.  
942 2017. Identifying targets and agents of selection: innovative methods to evaluate the  
943 processes that contribute to local adaptation. *Methods in Ecology and Evolution* 8:738–749.  
944 <http://doi.wiley.com/10.1111/2041-210X.12777>
- 945 Wang, T., O'Neill, G. A., & Aitken, S. N. (2010). Integrating environmental and genetic effects  
946 to predict responses of tree populations to climate. *Ecological Applications*, 20(1), 153–  
947 163. <https://doi.org/10.1890/08-2257.1>
- 948 Wang, T., A. Hamann, D. Spittlehouse, and C. Carroll. 2016. Locally Downscaled and Spatially  
949 Customizable Climate Data for Historical and Future Periods for North America. *Plos One*  
950 11:e0156720.
- 951 Wilczek, A. M., Cooper, M. D., Korves, T. M., Schmitt, J., Wilczeka, A. M., Cooper, M. D., ...  
952 Schmitt, J. (2019). Lagging adaptation to warming climate in *Arabidopsis thaliana*.  
953 *Proceedings of the National Academy of Sciences of the United States of America*, 111(22),  
954 7906–7913. <https://doi.org/10.1073/pnas.1709066111>
- 955 Yeaman, S., K.A. Hodgins, K.E. Lotterhos, H. Suren, S. Nadeau, J.C. Degner, K.A. Nurkowski,  
956 P. Smets, T. Wang, L.K. Gray, K.J. Liepe, A. Hamann, J.A. Holliday, M.C Whitlock, L.H  
957 Rieseberg, and S.N. Aitken. 2016. Convergent local adaptation to climate in distantly  
958 related conifers. *Science* 353:1431–1433. DOI: <https://doi.org/10.1126/science.aaf7812>
- 959 Yeaman, S., K.A. Hodgins, H. Suren, K.A. Nurkowski, L.H. Rieseberg, J.A. Holliday, and S.N.  
960 Aitken. 2014. Conservation and divergence of gene expression plasticity following c. 140  
961 million years of evolution in lodgepole pine (*Pinus contorta*) and interior spruce (*Picea*  
962 *glauca* × *Picea engelmannii*). *New Phytologist*, 203:578-591. DOI:  
963 <https://doi.org/10.1111/nph.12819>
- 964 Yang, J., S.H. Lee, M.E. Goddard, and P.M. Visscher. 2011. GCTA: A tool for genome-wide  
965 complex trait analysis. *The American Journal of Human Genetics* 88:76–82. DOI:  
966 <https://doi.org/10.1016/j.ajhg.2010.11.011>
- 967 Ying, C. C., and A. D. Yanchuk. 2006. The development of British Columbia's tree seed transfer  
968 guidelines: purpose, concept, methodology, and implementation. *Forest Ecology and*  
969 *Management* 227:1–13. <https://doi.org/10.1016/j.foreco.2006.02.028>
- 970 Zimin, A., K. A. Stevens, M. W. Crepeau, A. Holtz-Morris, M. Koriabine, G. Marcais, D. Puiu,  
971 M. Roberts, J. L. Wegrzyn, P. J. de Jong, D. B. Neale, S. L. Salzberg, J. A. Yorke, and C.  
972 H. Langley. 2014. Sequencing and Assembly of the 22-Gb Loblolly Pine Genome. *Genetics*  
973 196:875–890. DOI: <https://doi.org/10.1534/genetics.113.159715>

974

## **Supplementary Information**

975

976



977 **Table S1. Overlap between genotype-environment associations (GEA) from bayenv2 and genotype-phenotype associations (GPA).** The GEAs column  
 978 indicates the number of environmentally associated loci that met our filtering criteria (locus in top 300 ranks for Bayes factor across all three chains, and also in  
 979 top 300 ranks for *rho* across all three chains, after filtering for one SNP per contig). Numbers in phenotypic columns indicate the overlap of GEAs with GPA hits  
 980 (i.e., the same position in each association), with the number in the parenthesis being the additional number of unique GPA hits that were within 1000bp of a GEA  
 981 hit. Unique GPA Hits is the unique number of loci across these phenotypic columns for a given environmental variable, with parenthetical values indicating the  
 982 additional number of unique GPA hits within 1000bp of a GEA. The last row indicates the unique number of SNPs from a given column. Environmental  
 983 abbreviations as in Table 1 of main text.

| Environmental Variable | GEAs | Budbreak | Budset   | Cold injury | Shootmass | Unique GPA Hits |
|------------------------|------|----------|----------|-------------|-----------|-----------------|
| AHM                    | 202  | 15 (5)   | 41 (23)  | 4 (2)       | 1 (1)     | 52 (26)         |
| CMD                    | 238  | 32 (12)  | 67 (33)  | 36 (12)     | 25 (8)    | 86 (36)         |
| DD5                    | 192  | 46 (26)  | 32 (11)  | 48 (14)     | 39 (9)    | 82 (32)         |
| DD_o                   | 142  | 36 (21)  | 35 (21)  | 37 (15)     | 32 (10)   | 63 (32)         |
| EMT                    | 129  | 49 (17)  | 30 (12)  | 42 (12)     | 32 (9)    | 69 (26)         |
| EXT                    | 26   | 12 (4)   | 14 (6)   | 15 (4)      | 15 (3)    | 15 (6)          |
| Eref                   | 234  | 37 (9)   | 69 (29)  | 42 (14)     | 30 (9)    | 93 (35)         |
| FFP                    | 193  | 65 (17)  | 31 (7)   | 50 (9)      | 39 (8)    | 95 (23)         |
| MAP                    | 117  | 19 (11)  | 31 (23)  | 7 (5)       | 2 (3)     | 43 (29)         |
| MAT                    | 186  | 59 (30)  | 40 (25)  | 44 (16)     | 35 (10)   | 93 (47)         |
| MCMT                   | 188  | 49 (22)  | 29 (14)  | 41 (14)     | 30 (9)    | 70 (30)         |
| MSP                    | 202  | 23 (10)  | 52 (32)  | 16 (9)      | 10 (9)    | 64 (35)         |
| MWMT                   | 141  | 21 (8)   | 35 (12)  | 41 (12)     | 39 (8)    | 56 (18)         |
| NFFD                   | 2    | 0 (0)    | 0 (0)    | 0 (0)       | 0 (0)     | 0 (0)           |
| PAS                    | 112  | 0 (1)    | 3 (3)    | 4 (1)       | 3 (1)     | 9 (4)           |
| SHM                    | 233  | 30 (10)  | 65 (32)  | 33 (11)     | 22 (9)    | 85 (35)         |
| TD                     | 161  | 10 (9)   | 9 (13)   | 15 (10)     | 7 (7)     | 19 (17)         |
| bFFP                   | 167  | 52 (22)  | 26 (9)   | 43 (13)     | 37 (10)   | 79 (30)         |
| eFFP                   | 174  | 64 (18)  | 29 (8)   | 45 (11)     | 35 (10)   | 90 (26)         |
| unique loci            | 901  | 105 (44) | 102 (63) | 77 (34)     | 49 (24)   | 212 (105)       |

984

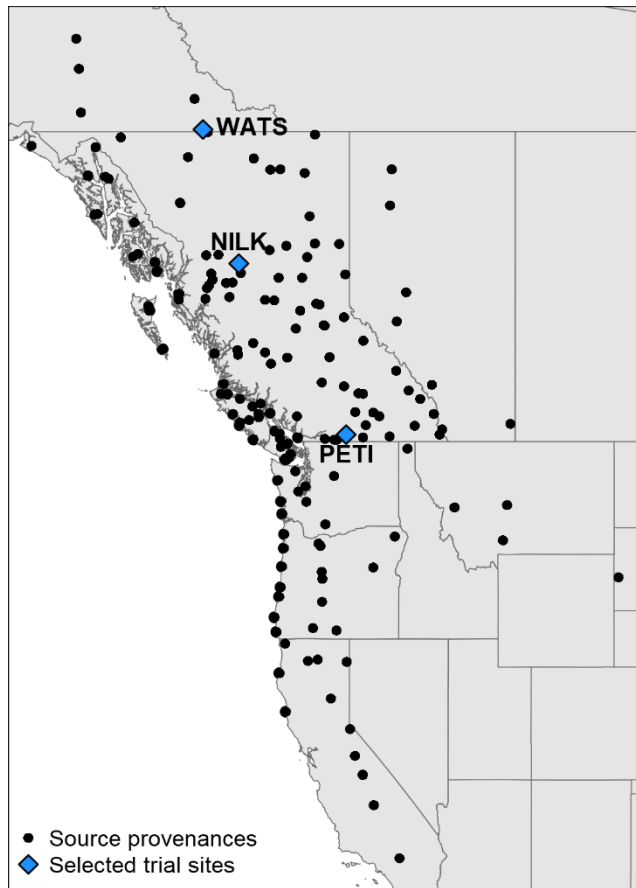

985  
986

Figure S1: Source provenances and selected trial sites for the Illingworth lodgepole pine provenance trial.

987

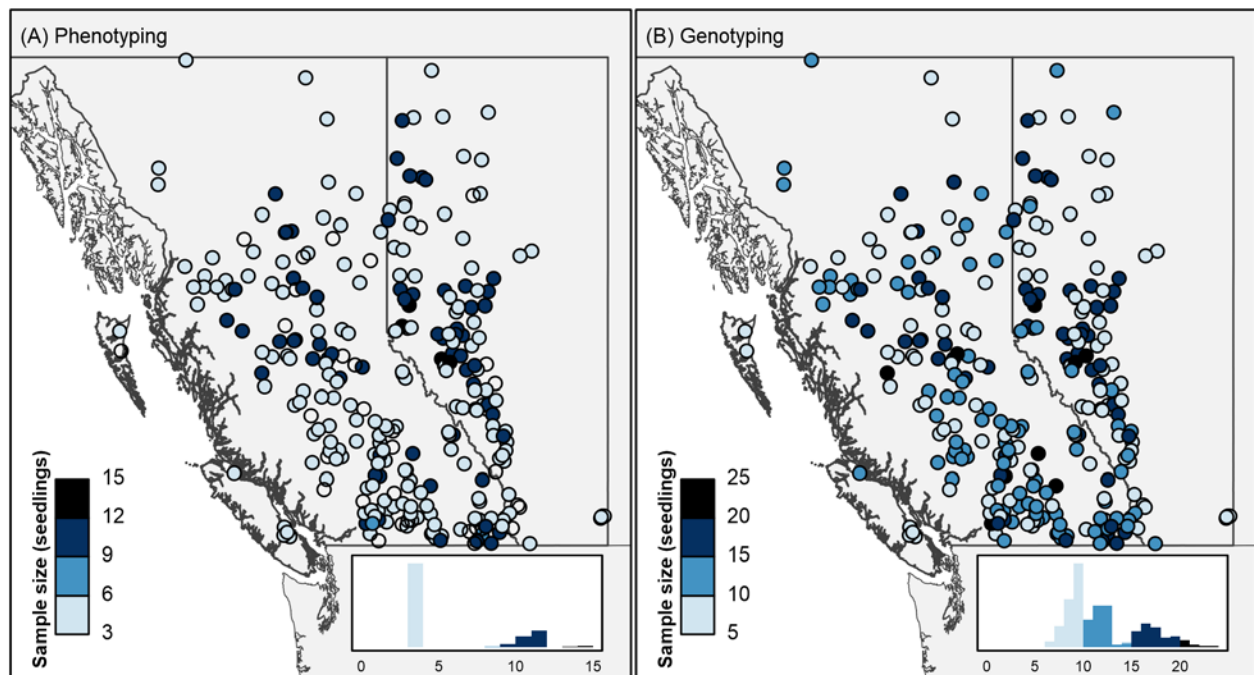

988  
989  
990

Figure S2: Sample size of common garden phenotyping and genotyping. SNP array Genotyping was conducted on phenotyped common garden seedlings and an additional sample of seedlings grown in a growth chamber.

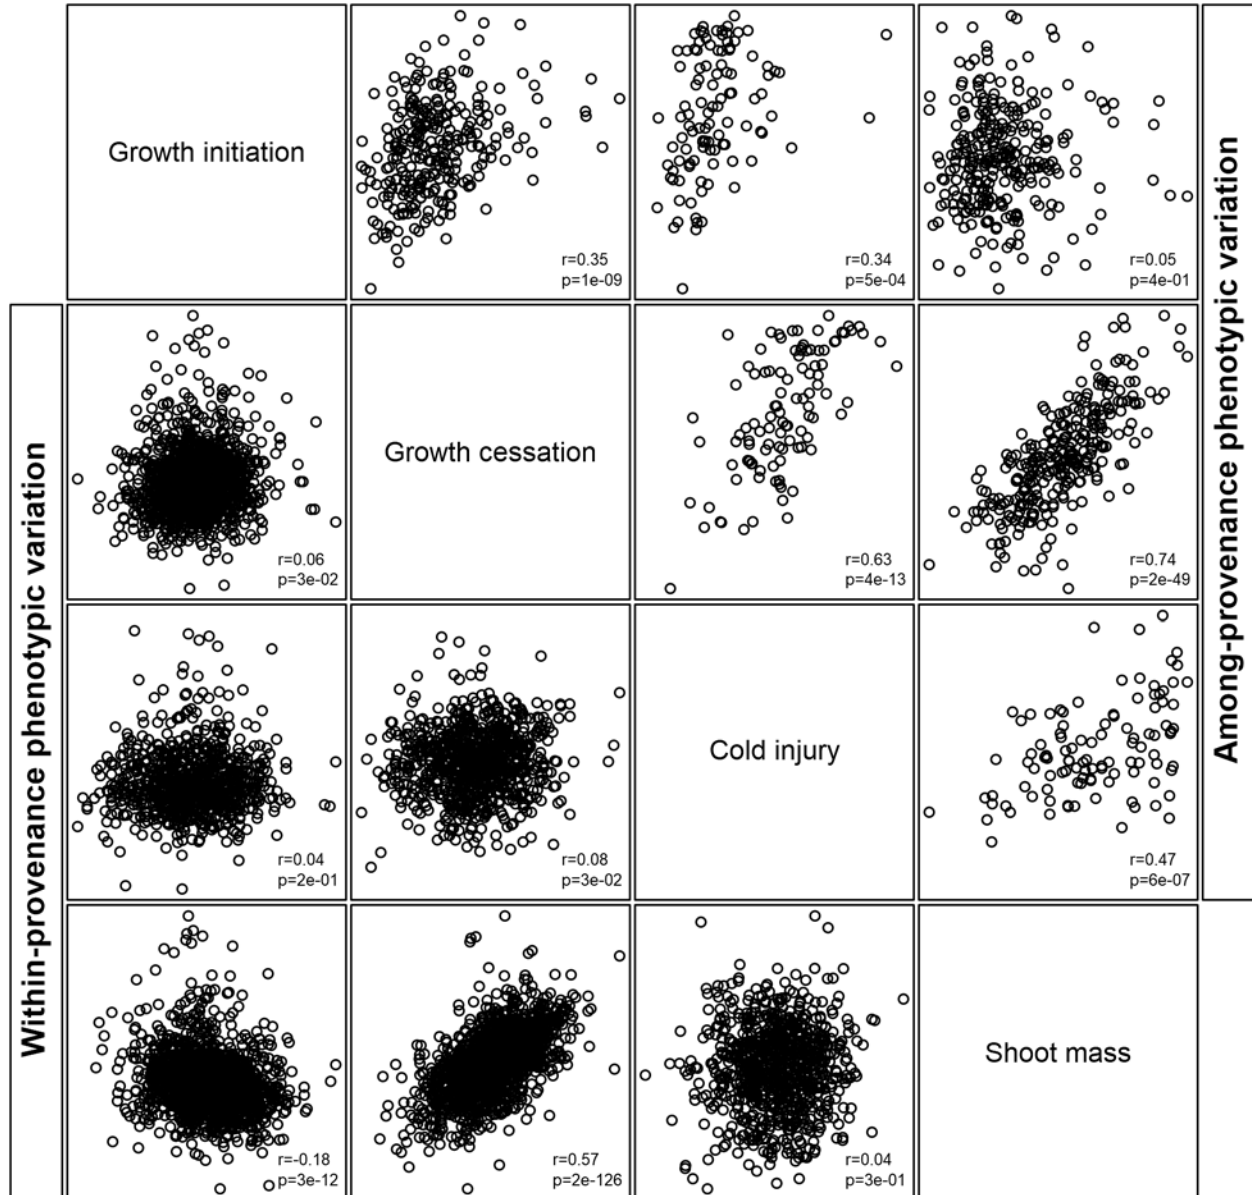

991  
992 **Figure S3: Among- and within-provenance relationships between the four traits.** Among-provenance variation is  
993 the variation of provenance-mean phenotypic values. Within- provenance variation is the variation of individual  
994 seedling phenotypes that have had their provenance-mean phenotypic value subtracted.

995

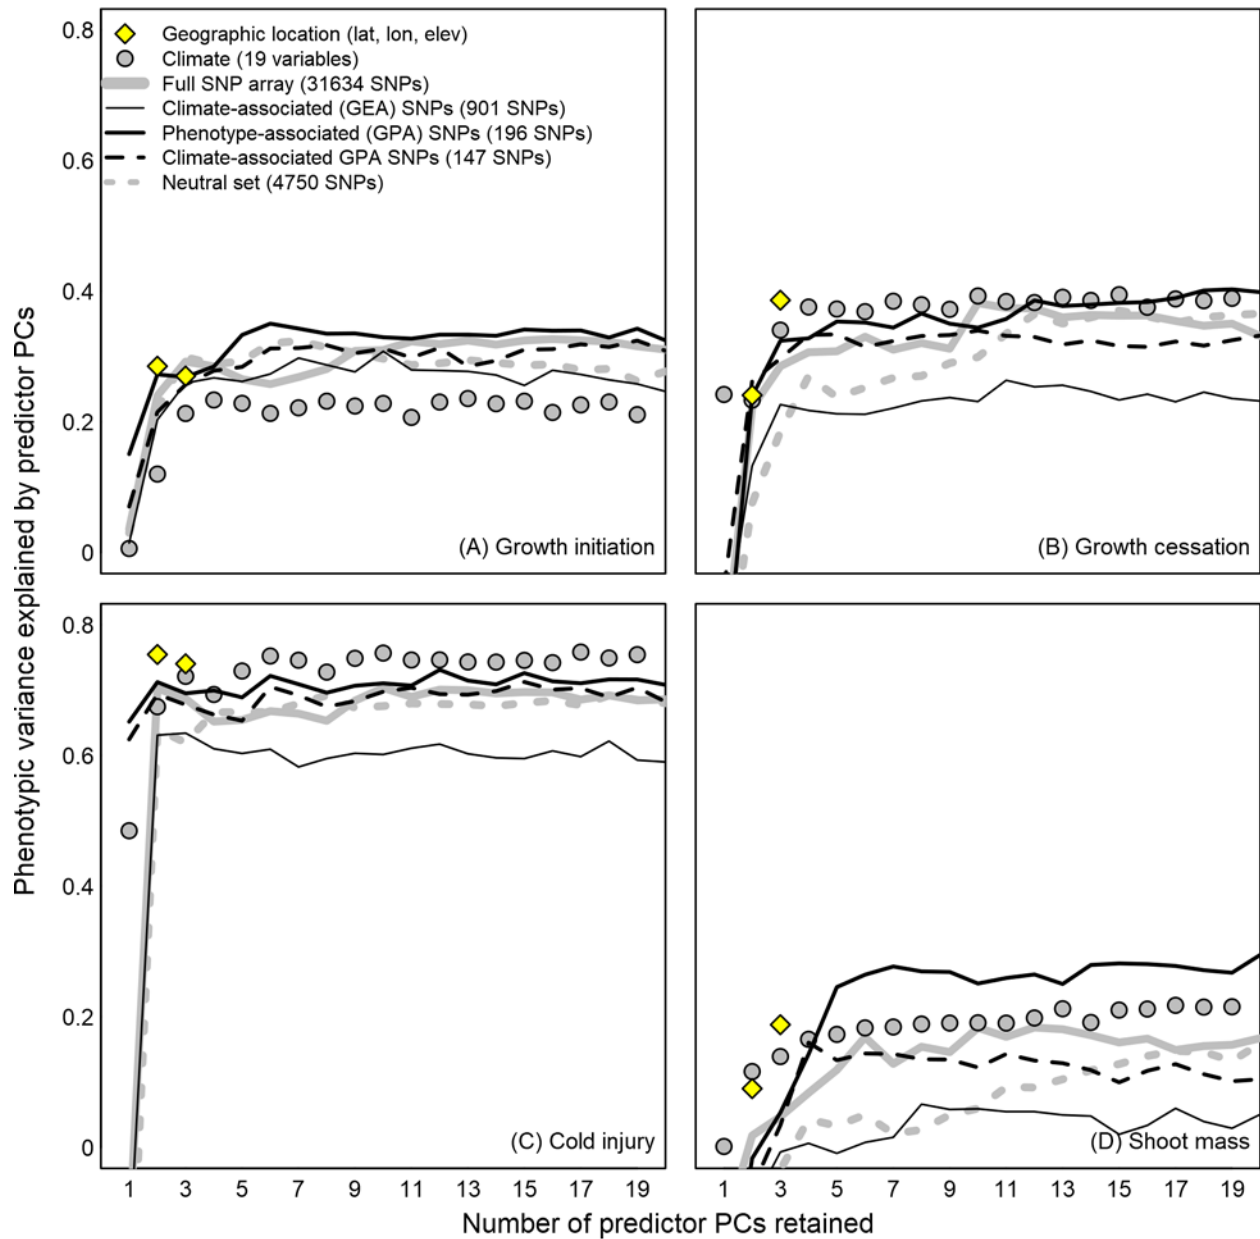

996  
 997 **Figure S4: Equivalent analysis for Figure 3, using Random Forest regression instead of linear regression.** Each  
 998 point is the pseudo- $R^2$  of a Random Forest regression of provenance-mean phenotype against the specified number of  
 999 principal components of the predictor data. GEA SNPs (thin black line) are the pooled top-300 SNPs based on Bayes  
 1000 factor from each of the 19 climate variables. GPA SNPs (thick black line) are the top 1% of coding-region SNPs  
 1001 (maximum of one SNP per contig) based on the p-value of a population-structure-corrected linear association of allele  
 1002 frequencies to seedling phenotypes. Climate-associated GPA SNPs (black dashed line) are GPA SNPs with further  
 1003 support for strong association to climate (see methods). The neutral set is shown as a grey dashed line

1004

1005

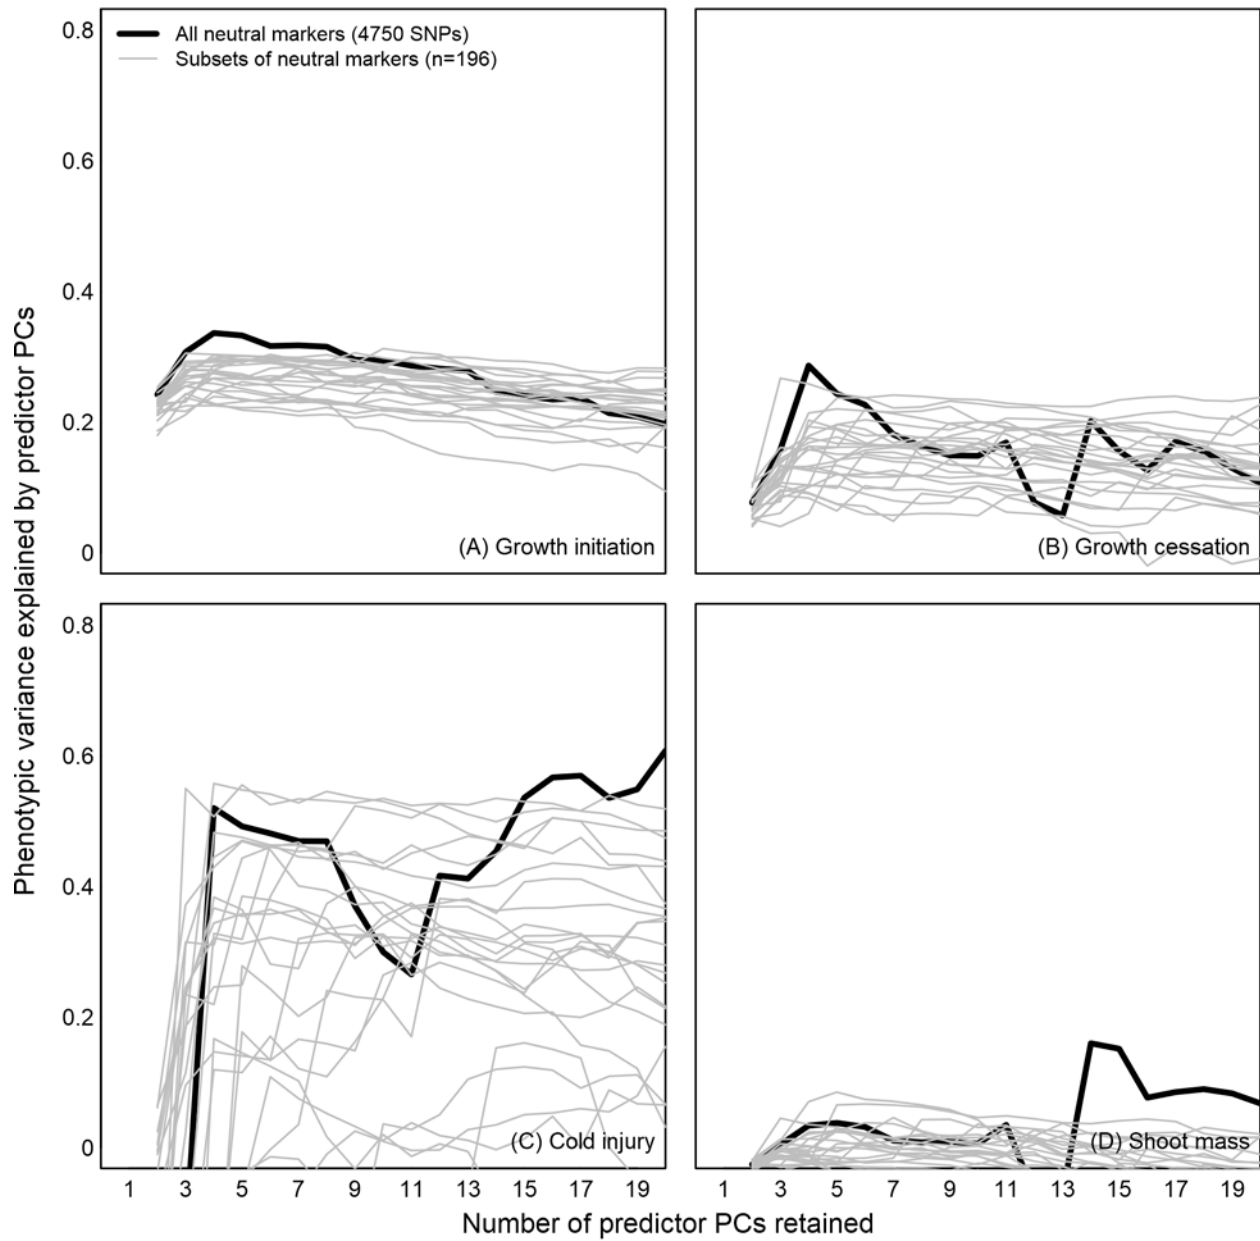

1006  
1007  
1008  
1009  
1010

**Figure S5: Explanatory power of small subsets of neutral SNPs.** Each point is the cross-validated  $R^2$  of a multiple linear regression of provenance-mean phenotype against the specified number of principal components of minor allele frequency in an  $n=196$  subset of neutral SNPs. Each grey line is a different subset, selected sequentially from the neutral set. The black line is the equivalent analysis for the full neutral set.

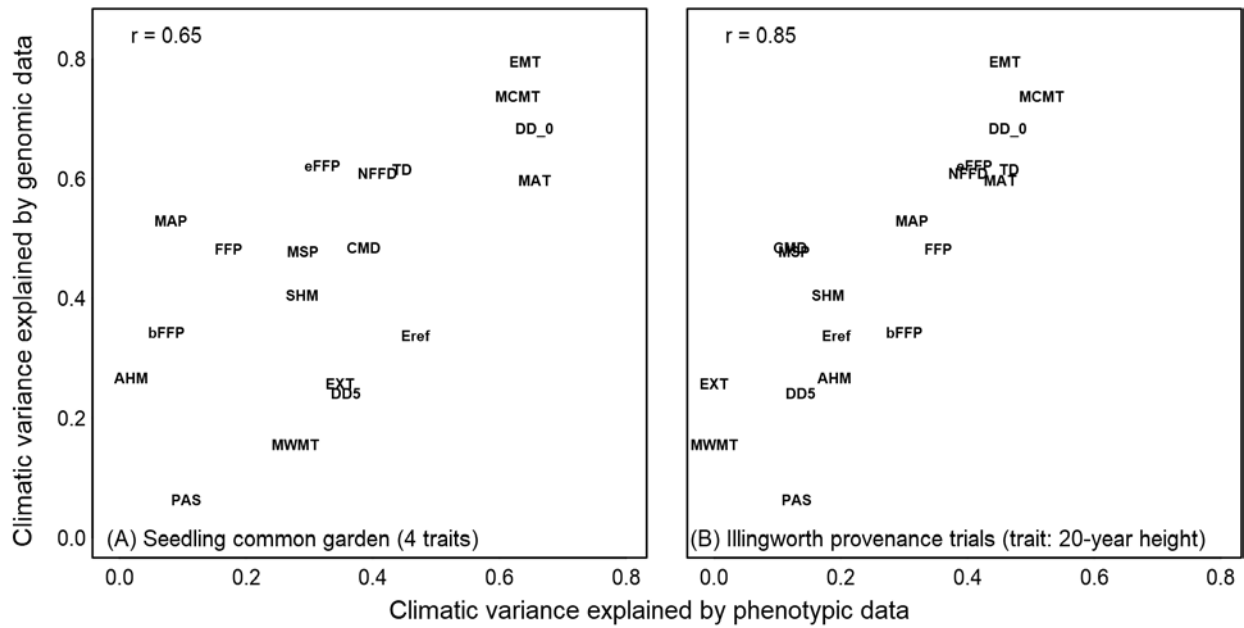

1011  
1012 **Figure S6: Climatic variable selection based on phenotypic vs genomic data, equivalent to Figure 4 except using**  
1013 **the full SNP array instead of GEA SNPs.** Variance explained is the cross-validated  $R^2$  of a multiple linear regression  
1014 of each climate variable (response variable) against the phenotypic or genomic predictor variable set. Genomic data  
1015 (predictor variables for the y-axis analyses) are four principal components of the minor allele frequencies for the full  
1016 SNP array ( $n=31634$  SNPs). Phenotypic data (predictor variables for the x-axis analyses) for panel A are provenance-  
1017 mean phenotypes for the four common-garden traits presented in Figure 2. Phenotypic predictor data for panel B are  
1018 20-year heights of the Illingworth lodgepole pine provenance trial. Climate variable acronyms are described in Table  
1019 1.

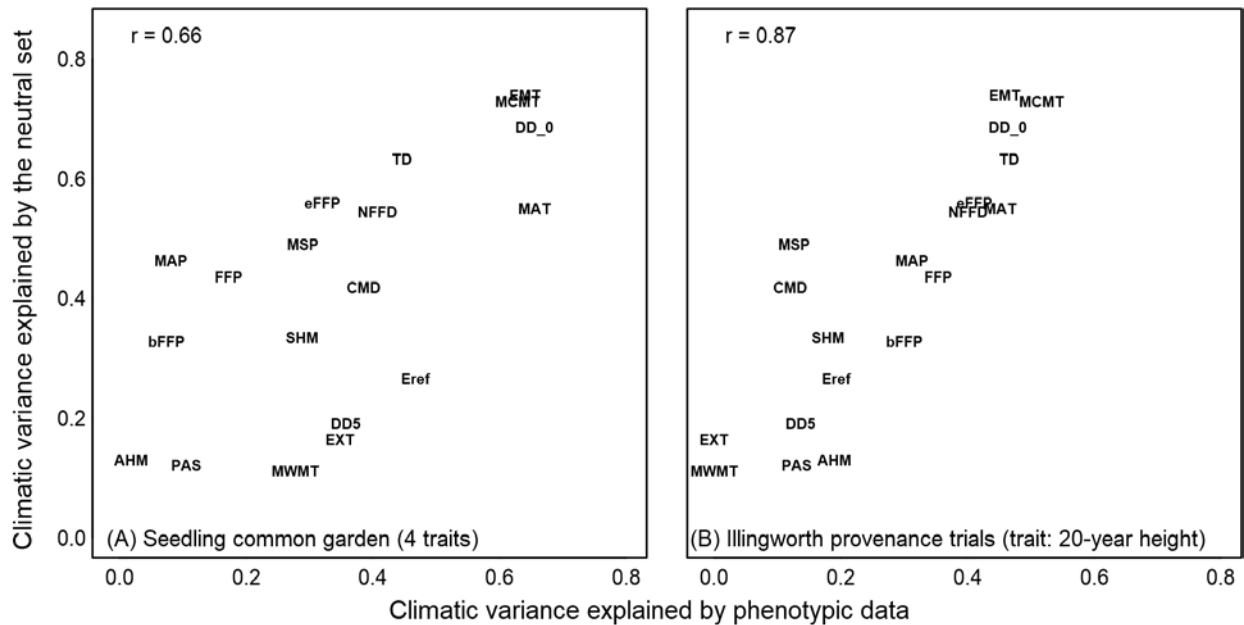

1020  
1021 **Figure S7: As in Figure S6 above, but using the neutral set ( $n=4750$  SNPs) instead of the full SNP array.**

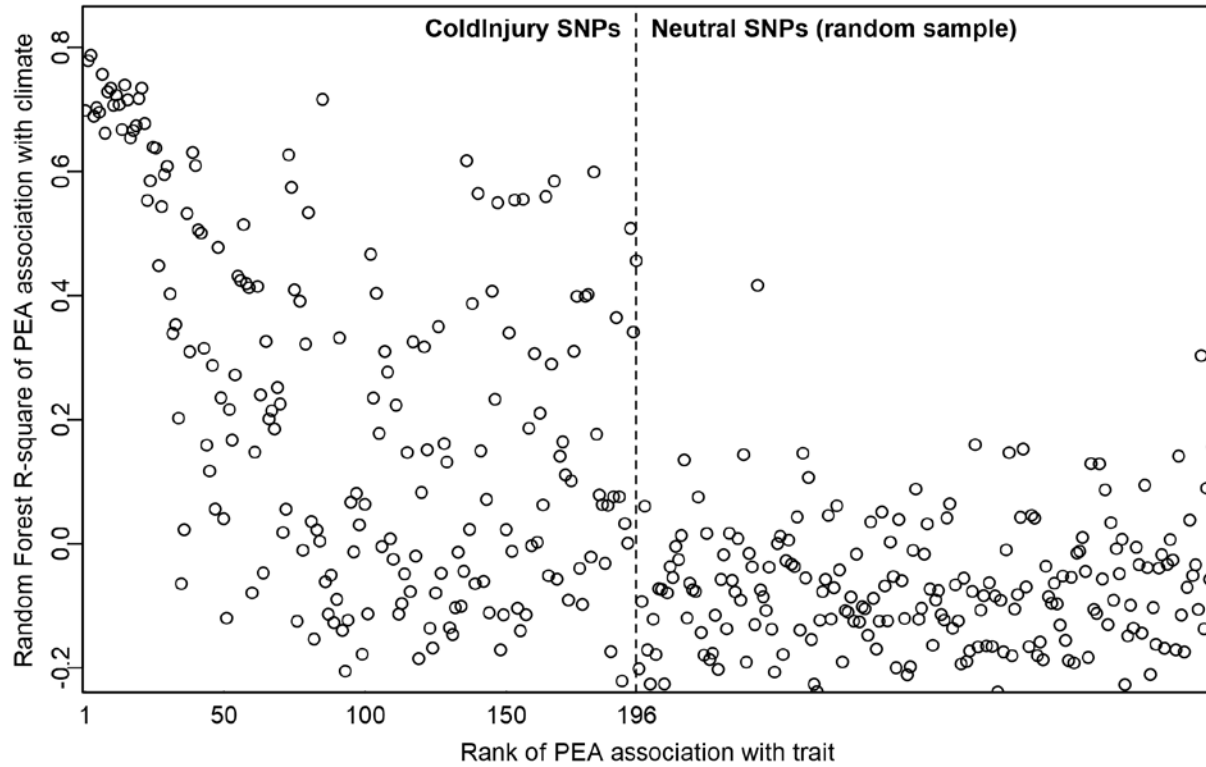

1022  
1023 **Figure S8: Relationship of GPA-selected loci to climate.** The y axis is the pseudo- $R^2$  of a random forest regression  
1024 of population-mean PEA frequency (response variable) to the 19 bioclimate predictor variables. PEAs are arranged in  
1025 order of increasing GPA  $p$ -value (decreasing significance), with a random sample of neutral SNPs shown for  
1026 comparison.

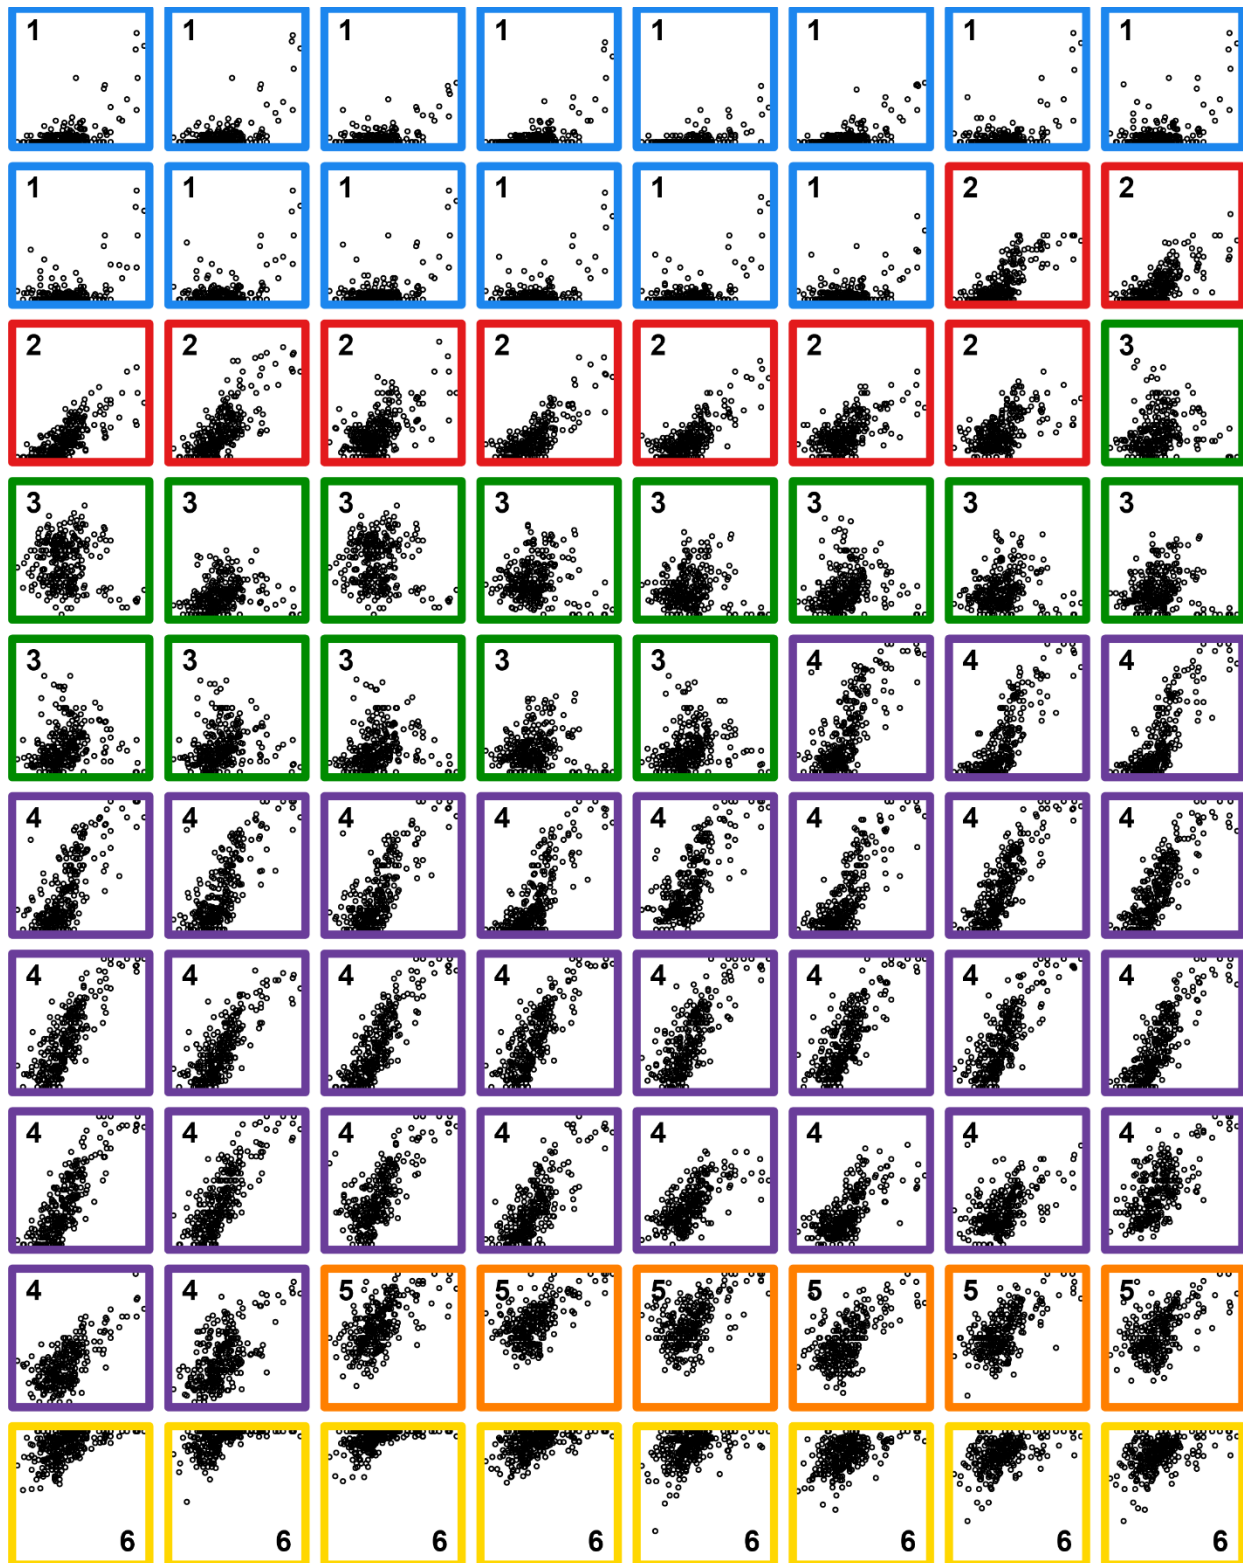

1027  
1028  
1029  
1030

**Figure S9: Genetic clines of climate-associated ( $\text{pseudo-}R^2 > 0.32$ ) GPA loci for autumn cold injury. Loci are clustered by PEA frequency across provenances. The x axis is autumn mean daily minimum temperature; the y axis is population-mean PEA frequency.**



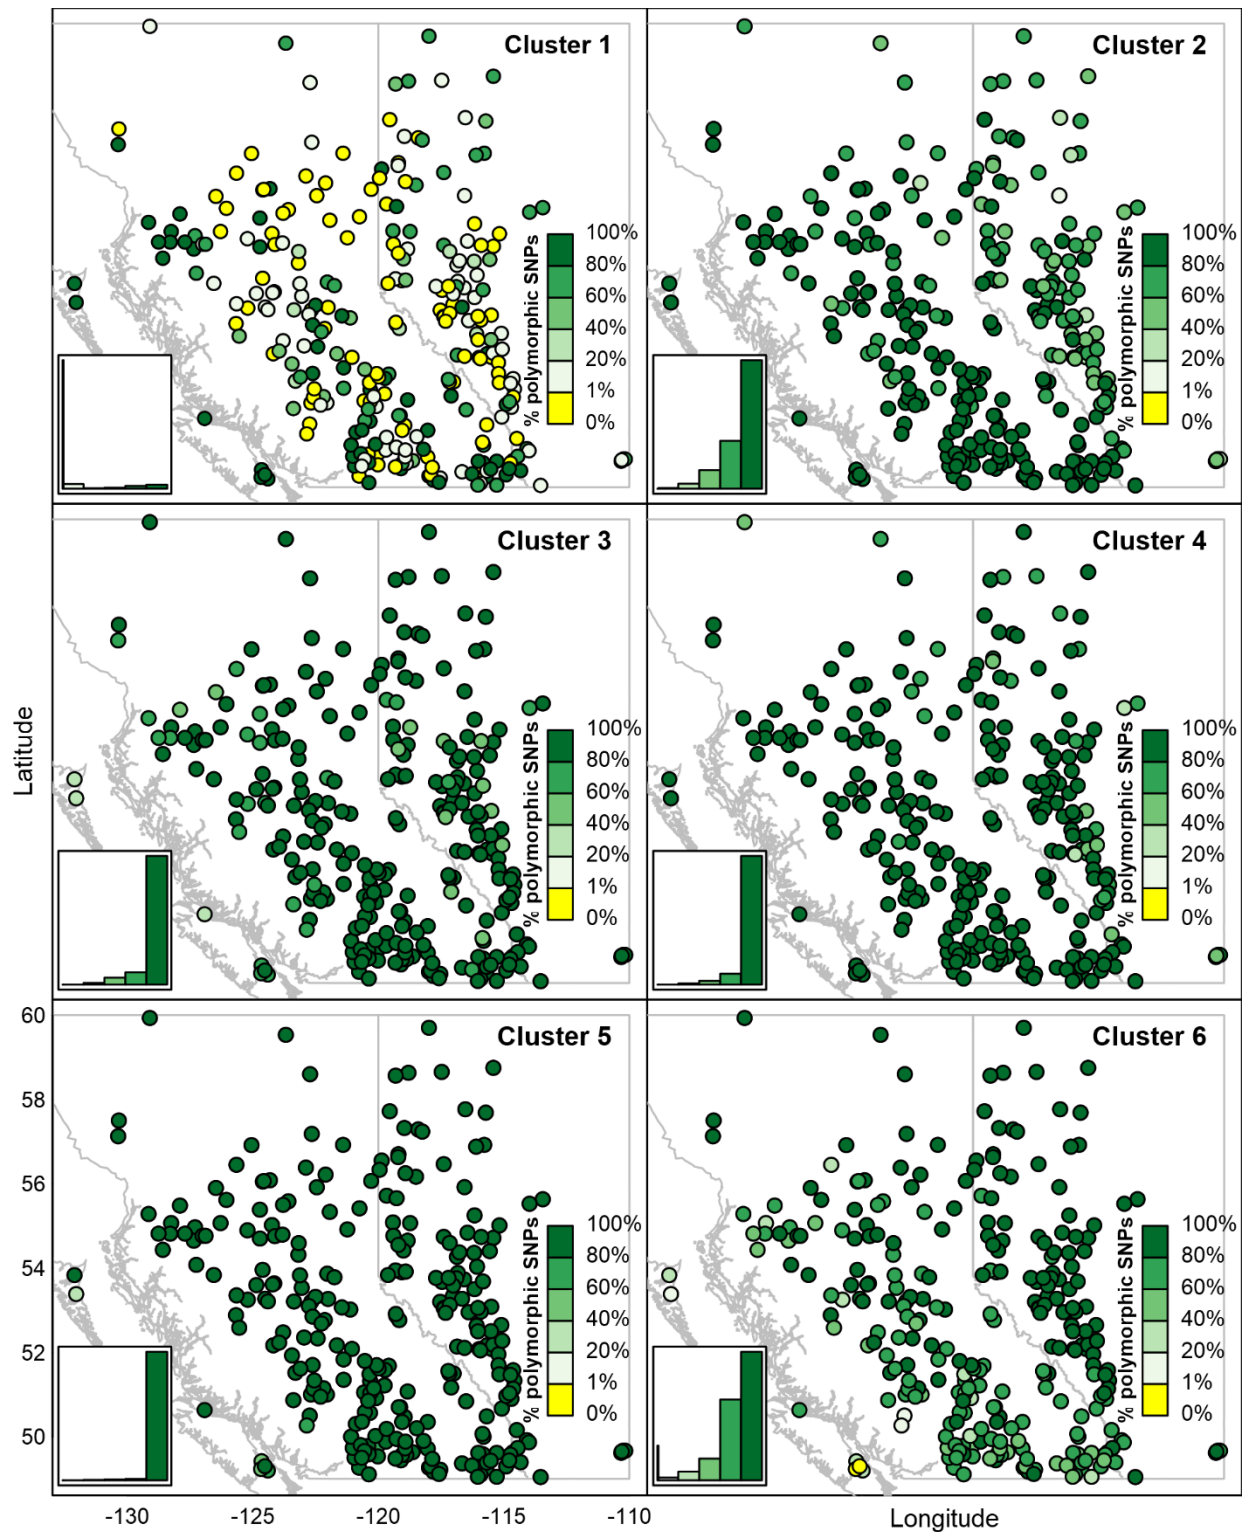

1031  
1032  
1033

**Figure S10:** proportional polymorphism, by cluster, for each provenance: The percentage of the SNPs in each cluster that have standing variation in both alleles, i.e.,  $H_e > 0$ .

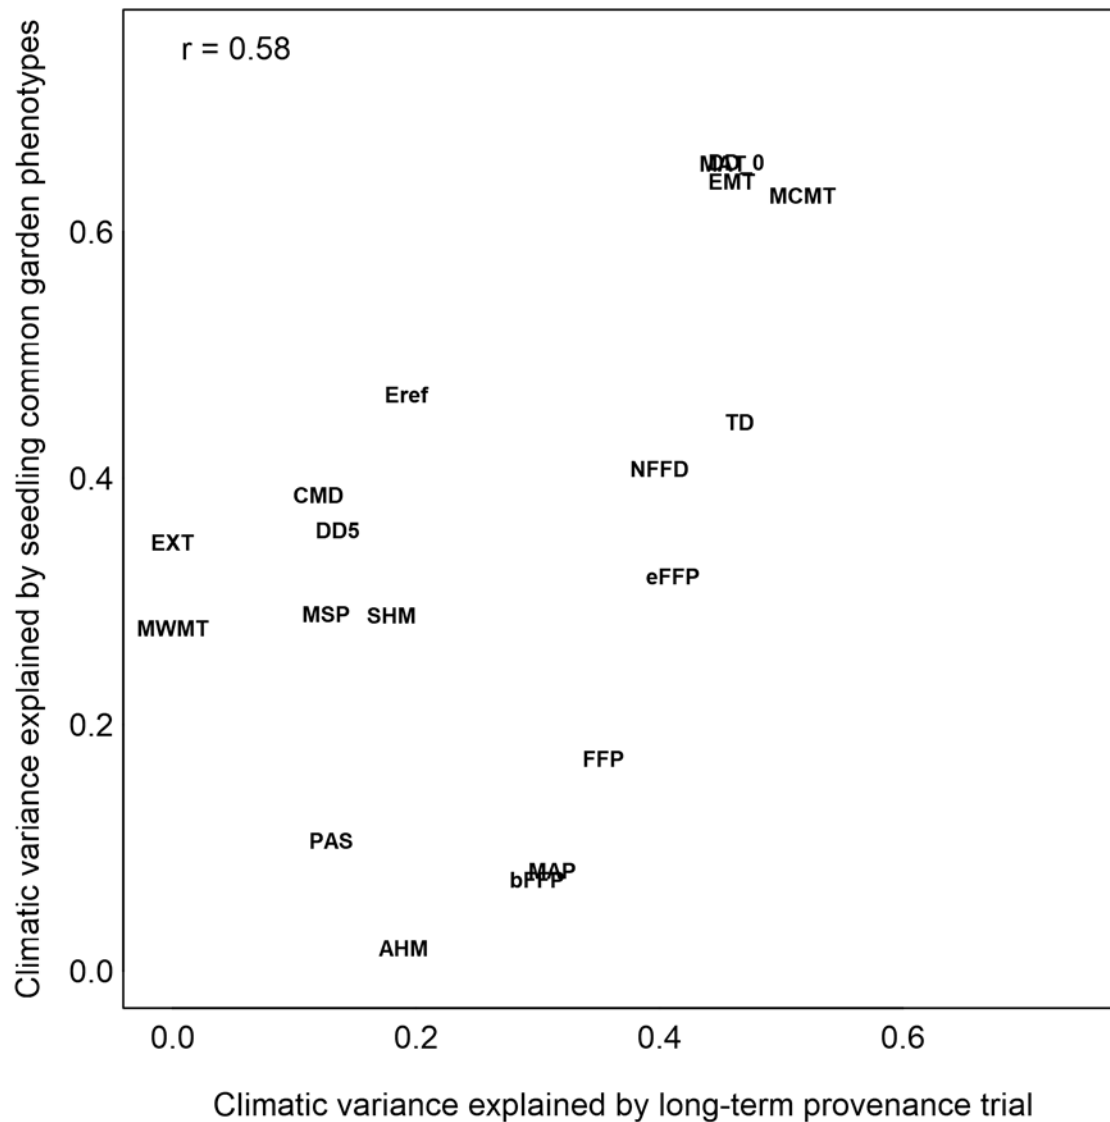

1034  
1035 **Figure S11: Climatic variable selection based on seedling common garden phenotypes vs. long-term provenance**  
1036 **trial heights.** Variance explained is the cross-validated  $R^2$  of a multiple linear regression of each climate variable  
1037 (response variable) against the phenotypic predictor variable set. Phenotypic predictor data for the x-axis are 20-year  
1038 heights of the Illingworth lodgepole pine provenance trial. Predictor variables for the y-axis are provenance-mean  
1039 phenotypes for the four common-garden traits presented in Figure 2. Climate variable acronyms are described in Table  
1040 1.

1041

1042

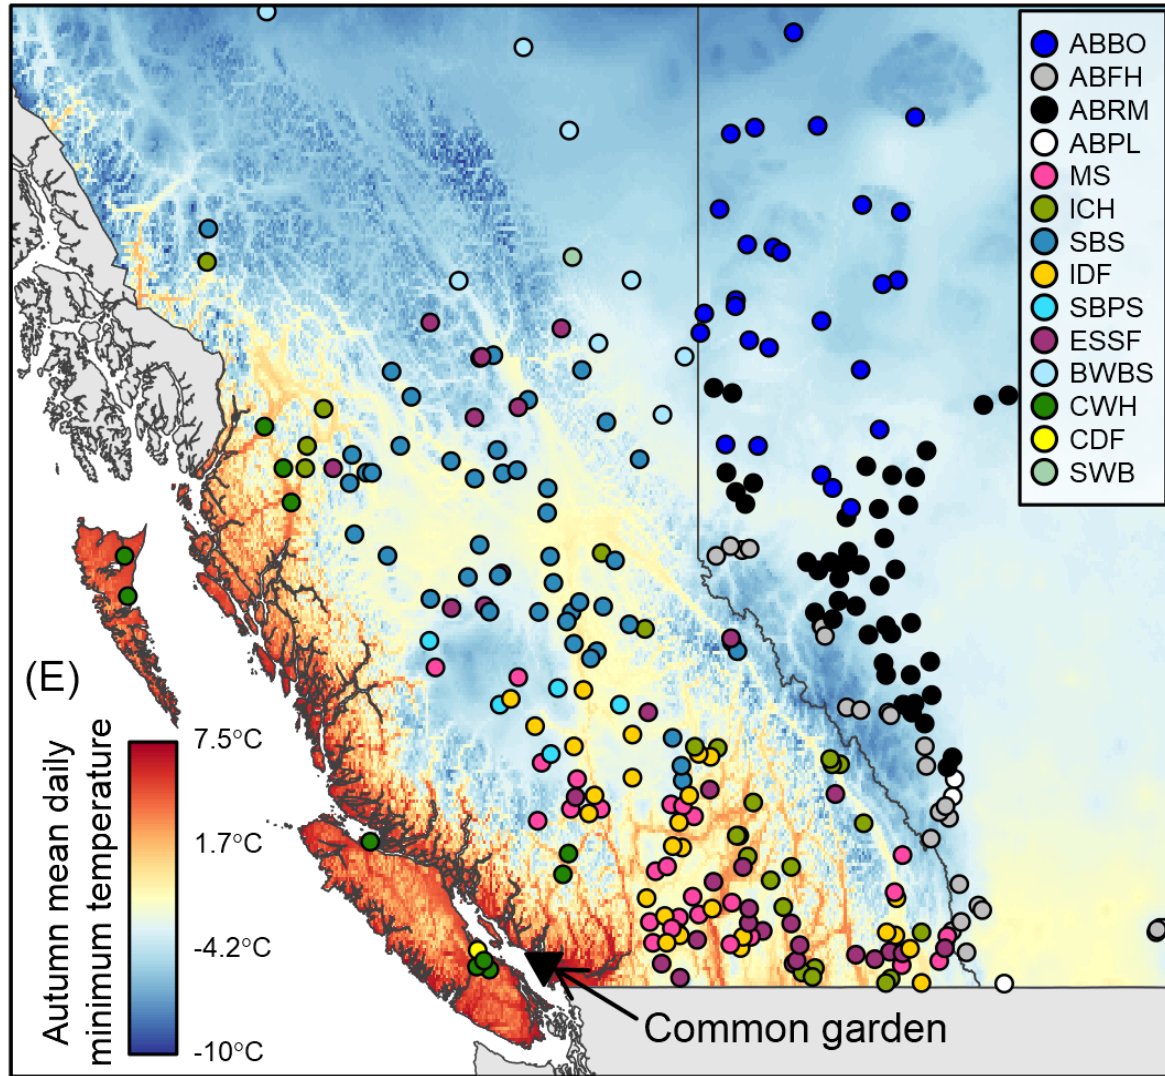

1043  
1044

Figure S12: Biogeoclimatic zones (British Columbia) and natural regions (Alberta) of each sampled provenance.

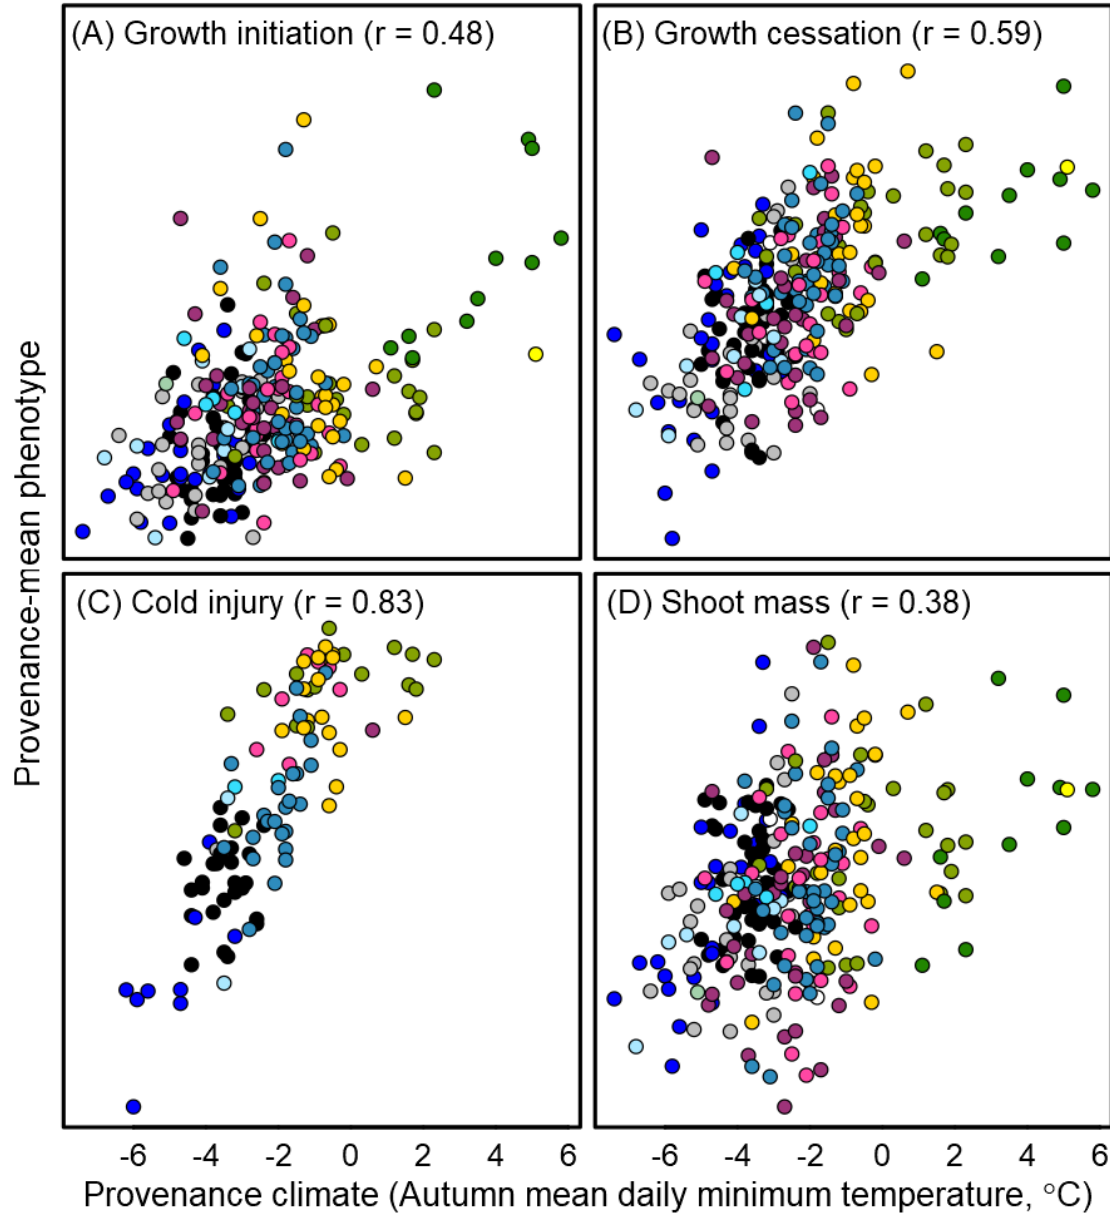

1045  
1046 **Figure S13: Phenotypic clines of four traits in lodgepole pine seedlings grown in the Vancouver common garden,**  
1047 **colour themed by biogeoclimatic zone (British Columbia) and natural region (Alberta). See Figure S12 for map and**  
1048 **color schemes.**

1049

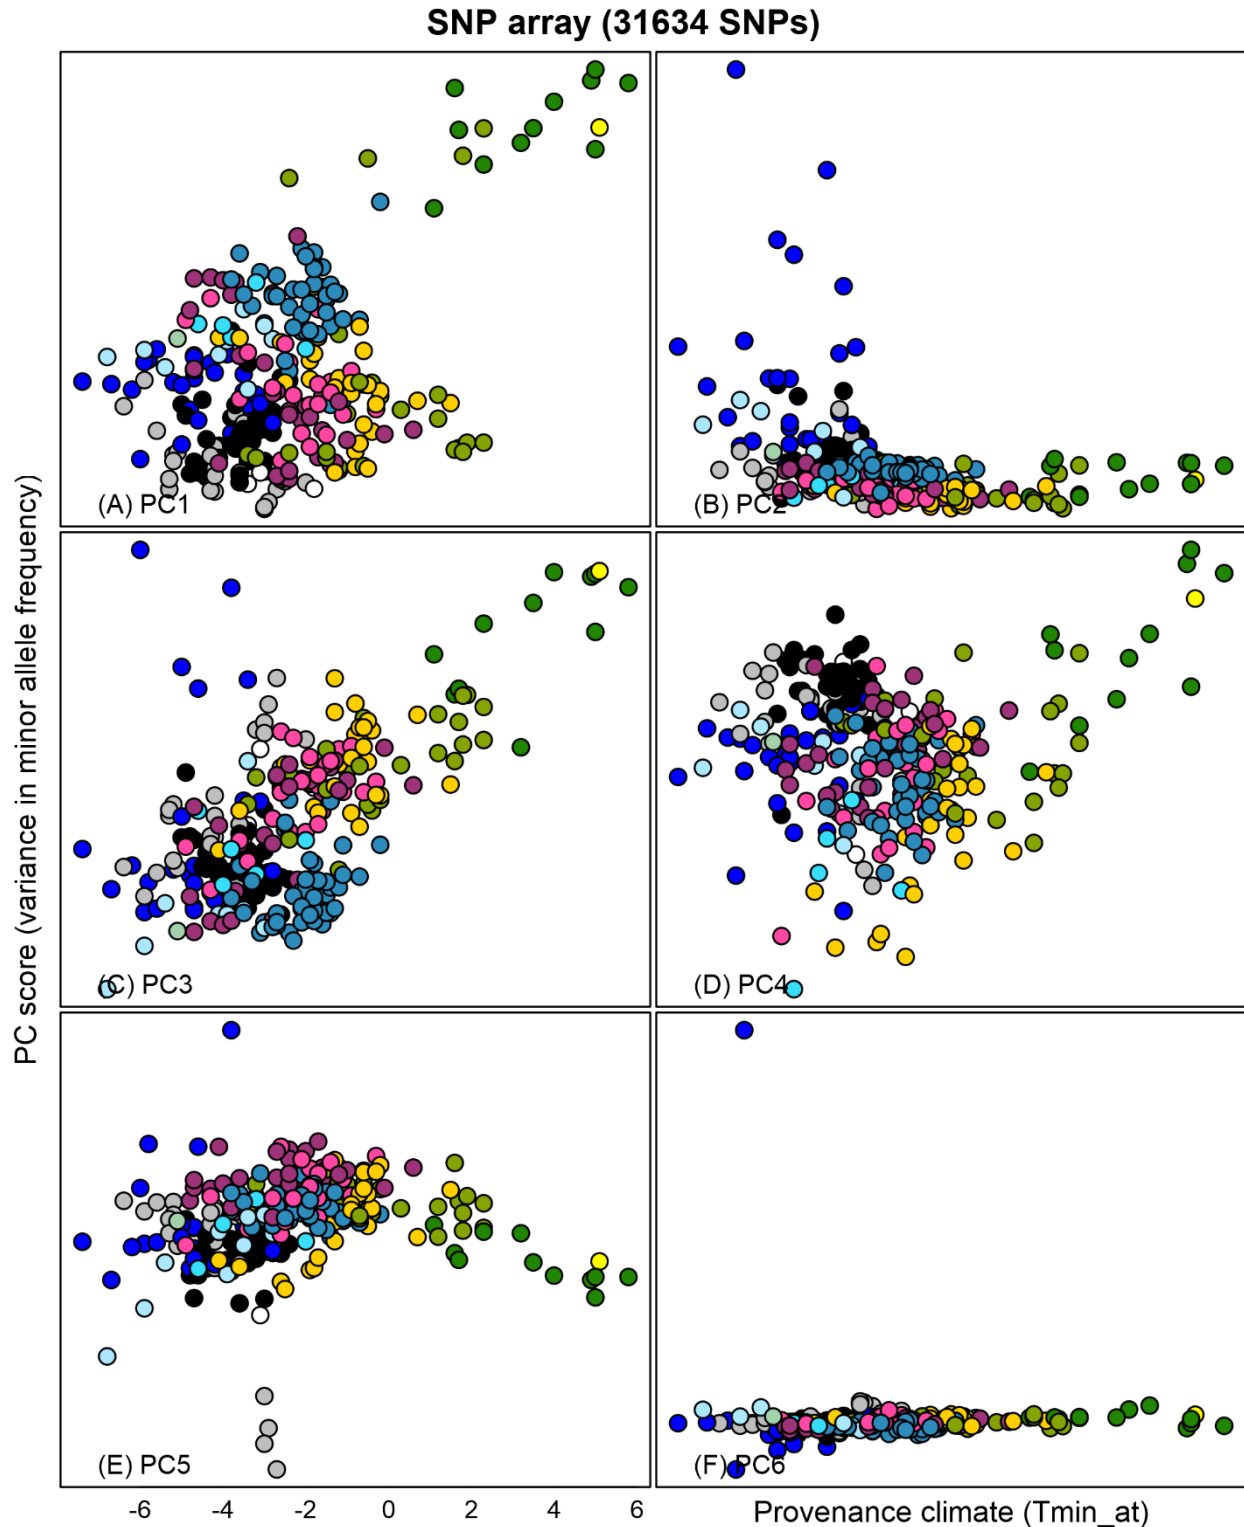

1050  
1051 **Figure S14. First six principal components of z-standardized provenance-mean minor allele**  
1052 **frequencies in the full SNP array (excluding the neutral set), plotted against autumn**  
1053 **temperature. Provenances are colour themed by biogeoclimatic zone (British Columbia) and**  
1054 **natural region (Alberta). See Figure S12 for map and color scheme.**

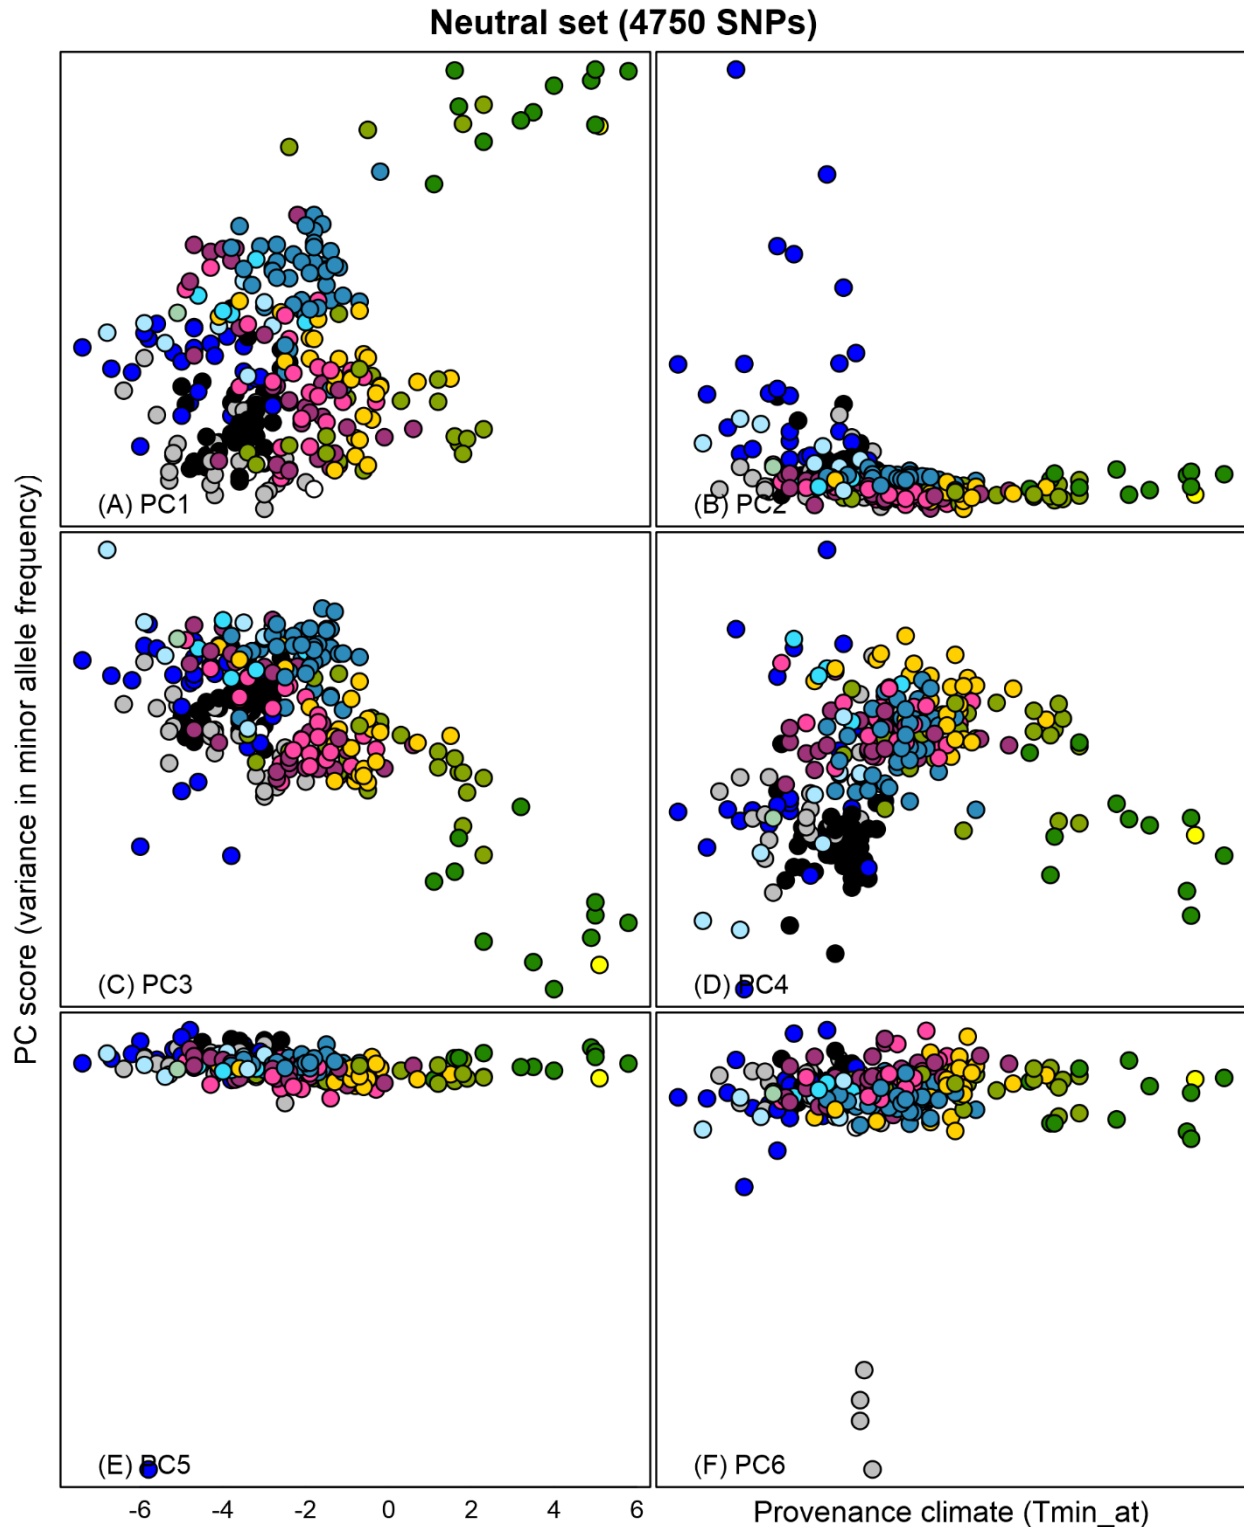

1055  
1056  
1057  
1058

**Figure S15. First six principal components of z-standardized provenance-mean minor allele frequencies in the neutral set**, plotted against autumn temperature. Provenances are colour themed by biogeoclimatic zone (British Columbia) and natural region (Alberta). See Figure S12 for map and color scheme.

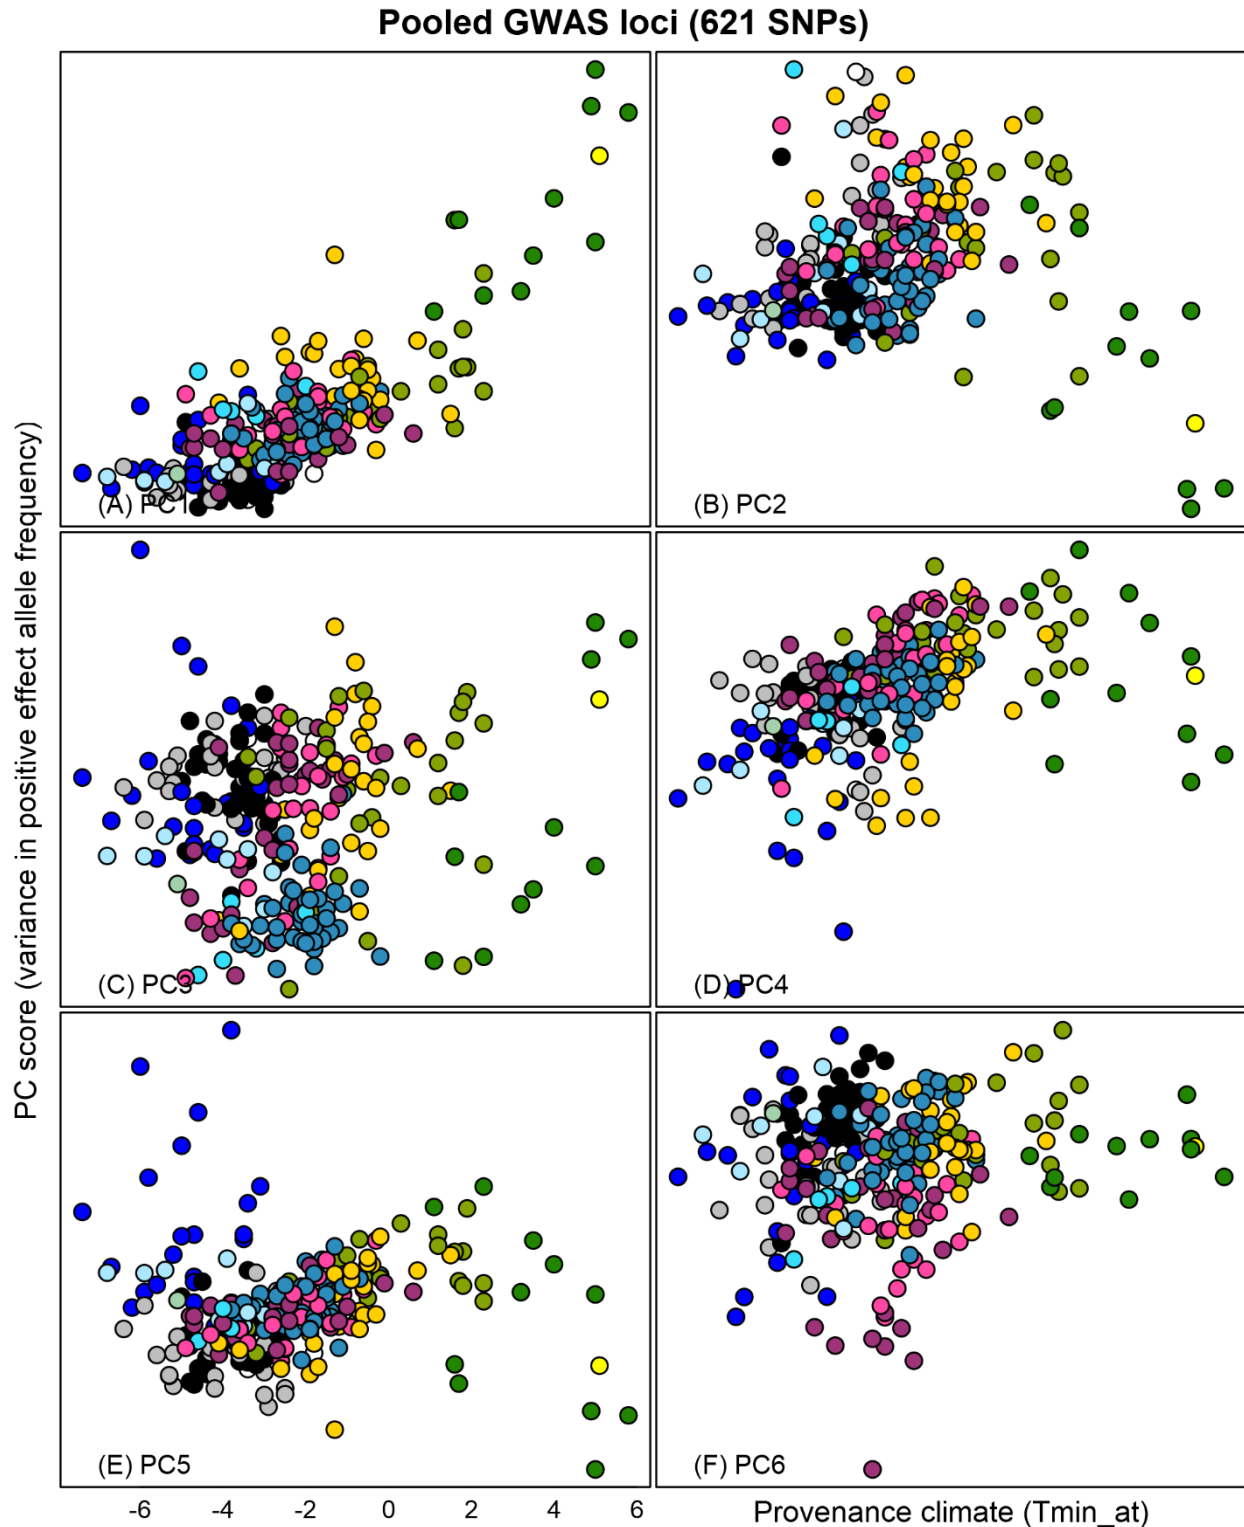

1059  
1060  
1061  
1062  
1063

**Figure S16. First six principal components of z-standardized provenance-mean positive-effect allele frequencies in the pooled GWAS loci for all four common garden traits, plotted against autumn temperature.** Provenances are colour themed by biogeoclimatic zone (British Columbia) and natural region (Alberta). See Figure S12 for map and color scheme.

1064
